# Supplementary material
Source: PubMed Central journal article supplement (PMC7332371)
Supplement: NIHMS1587336-supplement-Supplement.pdf [file NIHMS1587336-supplement-Supplement.pdf]

## SUPPLEMENTAL MATERIAL

### A variant near *DHCR24* associates with white-matter microstructure and peripheral lipid metabolism in adolescents

Eeva Sliz, Jean Shin, Catriona Syme, Yash Patel, Nadine Parker, Louis Richer, Daniel Gaudet, Steffany Bennett, Tomas Paus, Zdenka Pausova

#### Table of Contents

|                                                                                                                                                                        |           |
|------------------------------------------------------------------------------------------------------------------------------------------------------------------------|-----------|
| <b>Supplemental Methods</b> .....                                                                                                                                      | <b>1</b>  |
| <i>Genotyping</i> .....                                                                                                                                                | 1         |
| <i>MRI of the brain and abdomen</i> .....                                                                                                                              | 1         |
| <i>Lipidomics and metabolomics</i> .....                                                                                                                               | 1         |
| <b>Figure S1. Associations of rs588709 with white matter T1W-SI, visceral fat and PC16:0/2:0 in SYS adolescents</b> .....                                              | <b>2</b>  |
| <b>Figure S2. <i>DHCR24</i> expression summarized</b> .....                                                                                                            | <b>3</b>  |
| <b>Figure S3. <i>TTC22</i> expression summarized</b> .....                                                                                                             | <b>4</b>  |
| <b>Figure S4. <i>LEXM/C1orf177</i> expression summarized</b> .....                                                                                                     | <b>5</b>  |
| <b>Figure S5. RP11-67L3.4 expression summarized</b> .....                                                                                                              | <b>6</b>  |
| <b>Figure S6. Expression of A) <i>DHCR24</i>, B) <i>TTC22</i>, and C) <i>LEXM/C1orf177</i> in the brain during lifespan</b> .....                                      | <b>7</b>  |
| <b>Figure S7. A) Cell Type and B) Gene Ontology (GO) enrichment analysis with top 1% of genes co-expressed with <i>DHCR24</i>, <i>TTC22</i>, and <i>LEXM</i></b> ..... | <b>8</b>  |
| <b>Figure S8. Genomic locations of rs588709 and the six CpG sites where DNA methylation associates with rs588709 in adolescence</b> .....                              | <b>9</b>  |
| <b>Figure S9. Associations of <i>DHCR24</i> rs588709 with 228 metabolic measures in SYS adolescents</b> .....                                                          | <b>10</b> |
| <b>Figure S10. Comparisons of the metabolic effects of <i>DHCR24</i>, <i>TM6SF2</i>, and <i>HMGCR</i> variants</b> .....                                               | <b>11</b> |
| <b>Table S1. DNA methylation in blood associating with rs588709 in mQTLdb</b> .....                                                                                    | <b>12</b> |
| <b>Table S2. Regulatory motifs altered by rs588709 as reported in HaploReg</b> .....                                                                                   | <b>13</b> |
| <b>Table S3. Metabolite mean concentrations and associations with rs588709 in SYS adolescents</b> .....                                                                | <b>14</b> |
| <b>References</b> .....                                                                                                                                                | <b>22</b> |

## Supplemental Methods

### *Genotyping*

The SYS adolescents and parents were genotyped in two waves. First, the initial batch of recruited adolescents ( $n=592$ ) were genotyped with the Illumina Human610-Quad BeadChip (Illumina;  $n=582,892$  single nucleotide polymorphisms [SNPs]) at the Centre National de Génotypage (Paris, France). Second, the remaining adolescents and all parents were genotyped with the HumanOmniExpress BeadChip (Illumina;  $n=729,295$  SNPs) at the Genome Analysis Centre of Helmholtz Zentrum München (Munich, Germany). For both chips, SNPs with call rate  $<95\%$ , minor allele frequency  $<0.01$ , or not in Hardy-Weinberg equilibrium ( $P < 1.0e-06$ ) were excluded. After this quality control (QC), 542,345 SNPs on the first chip and 644,283 SNPs on the second chip were available for the further analyses. To equate the set of SNPs genotyped on each chip and increase the SNP density, we performed genotype imputations. Haplotype phasing was performed with SHAPEIT v2.790 (1), using the subset of 313,653 post-QC SNPs that were present on both genotyping platforms and the 1000 Genome CEU reference panel (Phase 1, Release 3). Imputation was conducted on the phased data with IMPUTE2 (2). Markers with low imputation quality (information score  $<0.5$ ) or minor allele frequency  $<0.01$  were removed. After this quality control of imputation, a total of 8,511,049 SNPs was analyzed.

### *MRI of the brain and abdomen*

White-matter properties were assessed as T1-weighted signal intensity (T1W-SI) obtained as follows. T1W magnetic resonance imaging (MRI) of the brain was conducted using a Gyroscan NT 1.0-T scanner (Philips Healthcare) and a 3D radio frequency (RF)-spoiled gradient echo sequence consisting of 160 slices, 1-mm isotropic resolution, TR=25 ms, TE=4.2 ms, and flip angle=30°. An in-house image-processing pipeline was used to derive T1W-signal intensity (T1W-SI) values of white-matter voxels (3). Mean T1W-SI of white-matter voxels (cerebral lobes only) normalized by mean T1W-SI of the whole brain was the main variable studied here (3).

The quantity of visceral fat was determined by abdominal MRI using a semi-automated method (4,5). MRI of visceral fat was measured from T1W images of the abdomen acquired on a Gyroscan NT 1.0-T scanner (Philips Healthcare) in adolescents, and an Avanto 1.5-T scanner (Siemens) in adults. A 10-mm thick axial slice at the level of the umbilicus was selected to quantify visceral and subcutaneous fat, in  $\text{cm}^3$ , with a semi-automatic method described previously (4,5).

### *Lipidomics and metabolomics*

Quantification of the novel inflammatory marker, circulating phospholipid PC16:0/2:0, was performed from fasting blood serum samples using liquid chromatography-electrospray ionization-mass spectrometry (LC-ESI-MS); the method is described in more detail elsewhere (6,7). Shortly, a total of 69 GPC species were characterized within 450 to 680  $m/z$  range, as it was expected to contain lysophosphocholines (LPCs) and platelet-activating factors (PAFs) that function as important modulators of oxidative stress and inflammation (6–10).

Metabolomic profiling of a total of 228 circulating metabolic traits including a comprehensive set of lipoprotein subfractions and their lipids, fatty acids, and non-lipid metabolites were quantified from fasting serum samples by a commercially available nuclear magnetic resonance (NMR) based metabolomics platform (Nightingale Health Ltd, Helsinki, Finland) (11,12). The experimentation has been described previously (11,13).

Figure S1. Associations of rs588709 with white matter T1W-SI, visceral fat and PC16:0/2:0 in SYS adolescents.

Linear models were fitted to study the associations between the GWAS-lead variant and the individual components of the PC1 used as the study phenotype in the GWAS. Here, adjusted (age, sex, common family environment, and height for visceral fat) and transformed phenotypes served as outcomes and the rs588709 encoded as 0, 1, and 2 representing the number of GWAS effect alleles (G) served as an explanatory variable.

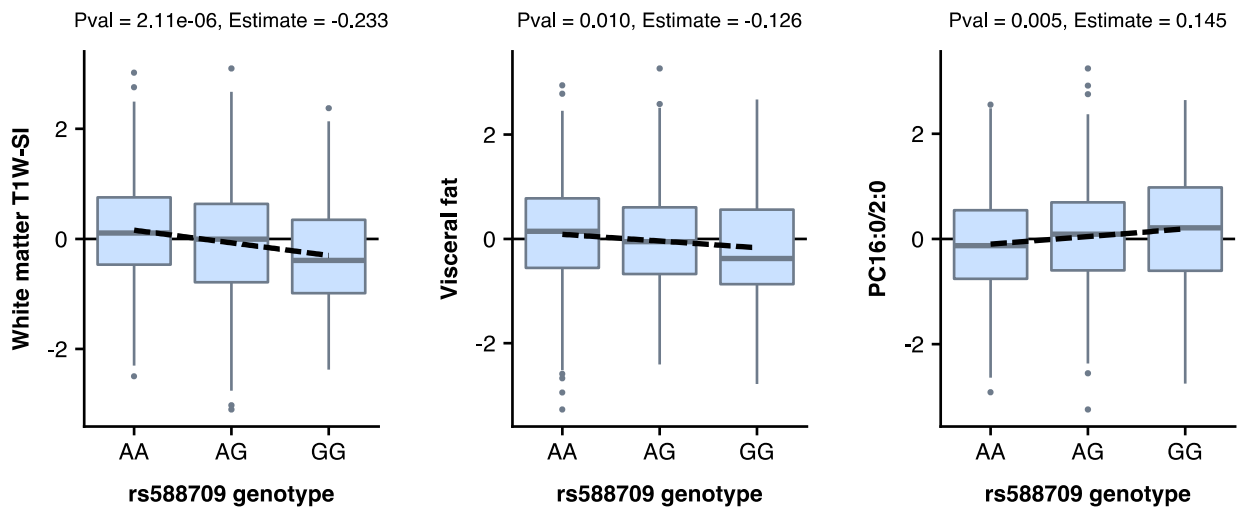

Figure S2. *DHCR24* expression summarized.

**A)** The effect of the GWAS-lead variant rs588709 on *DHCR24* gene expression was studied in GTEx portal (accessed on April 15<sup>th</sup>, 2019) (17). ‘Samples’ indicate the number of RNA-seq samples with genotype. Normalized effect size (NES) is the slope of the linear regression of the normalized data versus the three genotype categories using single-tissue expression quantitative trait locus (eQTL) analysis, representing eQTL effect size. The ‘p-value’ originates from a t-test that compares observed NES from single-tissue eQTL analysis to a null NES of 0. The ‘m-value’ indicates the posterior probability that an eQTL effect exists in each tissue tested in the cross-tissue meta-analysis. The effect estimates are for the G allele that was the effect allele in the present GWAS. **B)** The tissue expression of *DHCR24* in GTEx. Expression values are shown in Transcripts Per Million (TPM; y-axis) calculated from a model with isoforms collapsed to a single gene. The tissues are ordered according to the gene expression median (x-axis). **C)** Expression level of *DHCR24* in Braineac database (upper) and *DHCR24* expression stratified according to rs588709 genotype (lower) (braineac.org; accessed on April 15<sup>th</sup>, 2019). MEDU, medulla; WHMT, intralobular white matter; SNIG, substantia nigra; FCTX, frontal cortex; THAL, thalamus; HIPP, hippocampus; TCTX, temporal cortex; OCTX, occipital cortex; PUTM, putamen; CRBL, cerebellar cortex.

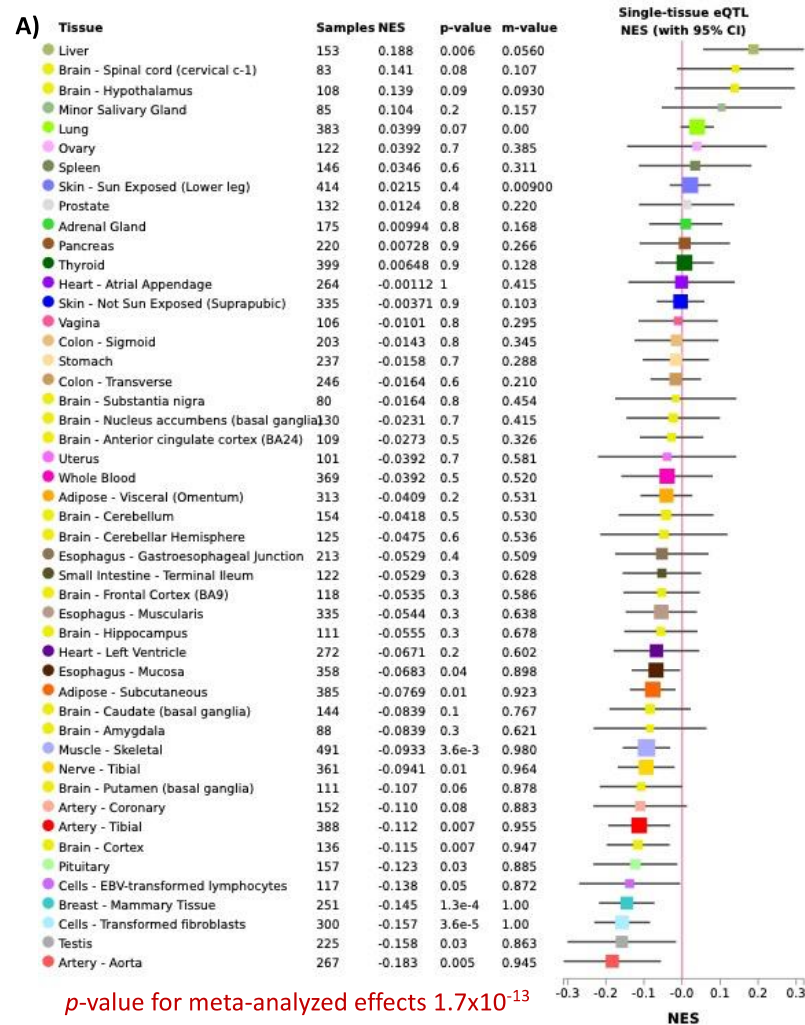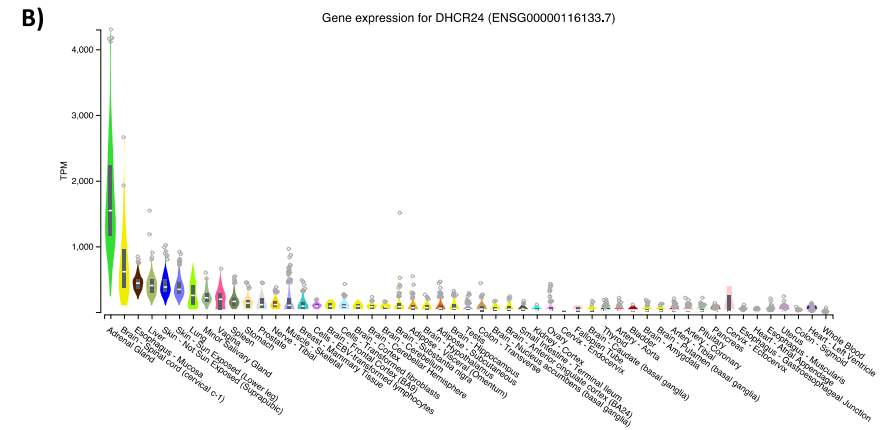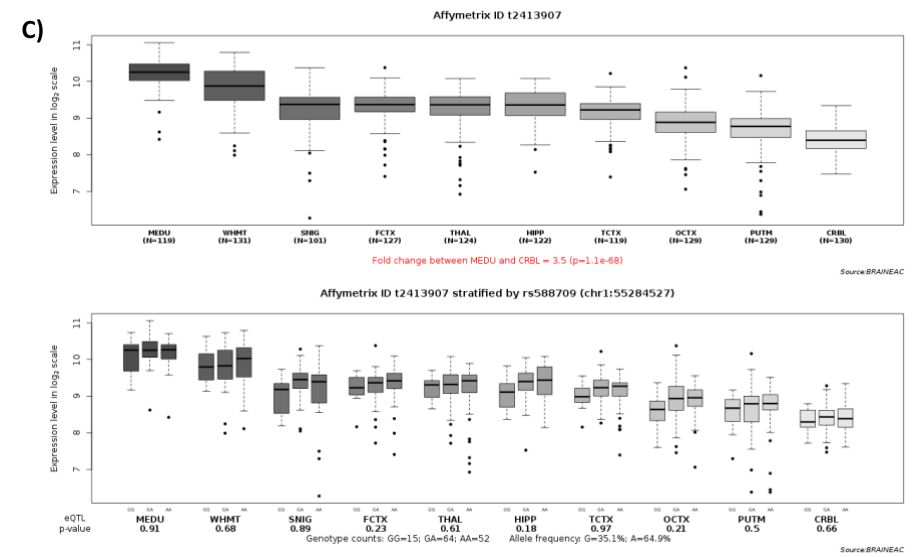

Figure S3. *TTC22* expression summarized.

**A)** The effect of the GWAS-lead variant rs588709 on *TTC22* gene expression was studied in GTEx portal (accessed on April 15<sup>th</sup>, 2019) (17). ‘Samples’ indicate the number of RNA-seq samples with genotype. Normalized effect size (NES) is the slope of the linear regression of the normalized data versus the three genotype categories using single-tissue expression quantitative trait locus (eQTL) analysis, representing eQTL effect size. The ‘p-value’ originates from a t-test that compares observed NES from single-tissue eQTL analysis to a null NES of 0. The ‘m-value’ indicates the posterior probability that an eQTL effect exists in each tissue tested in the cross-tissue meta-analysis. The effect estimates are for the G allele that was the effect allele in the present GWAS. **B)** The tissue expression of *TTC22* in GTEx. Expression values are shown in Transcripts Per Million (TPM; y-axis) calculated from a model with isoforms collapsed to a single gene. The tissues are ordered according to the gene expression median (x-axis). **C)** Expression level of *TTC22* in Braineac database (upper) and *TTC22* expression stratified according to rs588709 genotype (lower) (braineac.org; accessed on April 15<sup>th</sup>, 2019). MEDU, medulla; WHMT, intralobular white matter; SNIG, substantia nigra; FCTX, frontal cortex; THAL, thalamus; HIPP, hippocampus; TCTX, temporal cortex; OCTX, occipital cortex; PUTM, putamen; CRBL, cerebellar cortex.

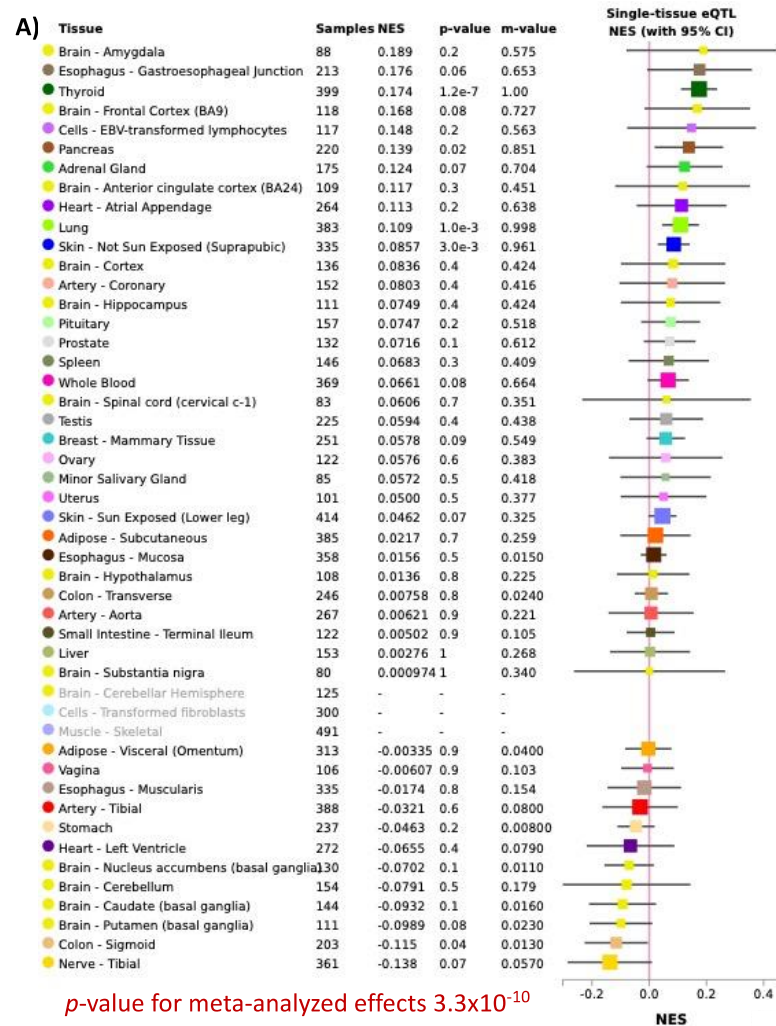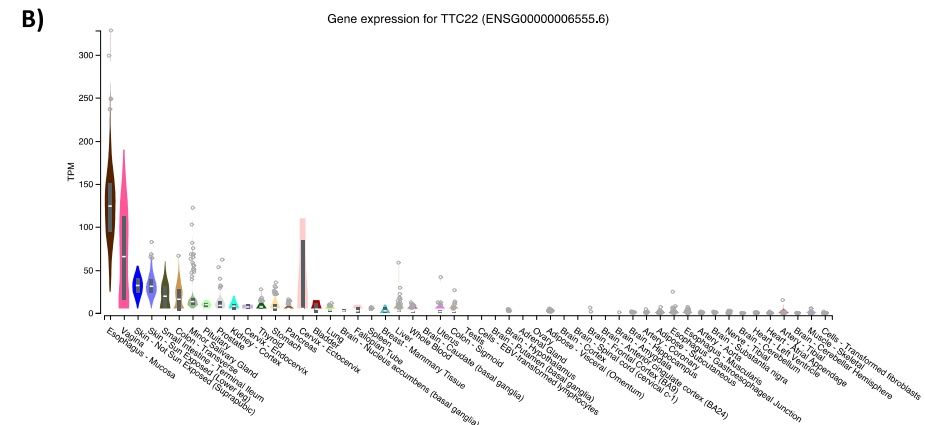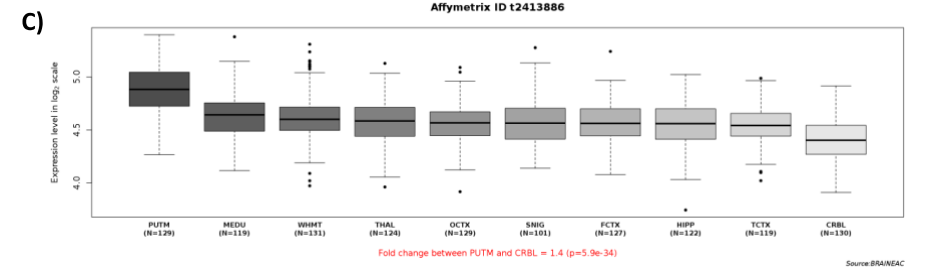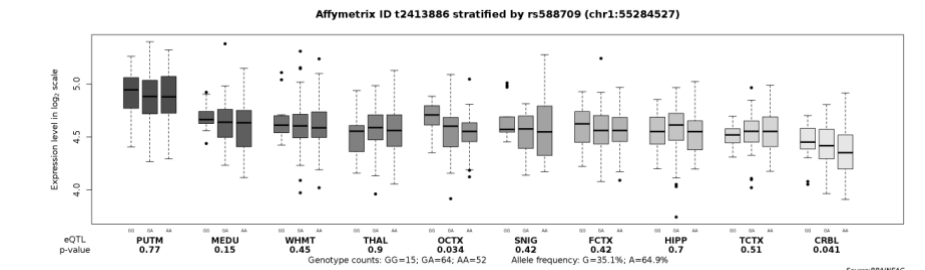

Figure S4. *LEXM/C1orf177* expression summarized.

**A)** The effect of the GWAS-lead variant rs588709 on *LEXM/C1orf177* gene expression was studied in GTEx portal (accessed on April 15<sup>th</sup>, 2019) (17). ‘Samples’ indicate the number of RNA-seq samples with genotype. Normalized effect size (NES) is the slope of the linear regression of the normalized data versus the three genotype categories using single-tissue expression quantitative trait locus (eQTL) analysis, representing eQTL effect size. The ‘p-value’ originates from a t-test that compares observed NES from single-tissue eQTL analysis to a null NES of 0. The ‘m-value’ indicates the posterior probability that an eQTL effect exists in each tissue tested in the cross-tissue meta-analysis. The effect estimates are for the G allele that was the effect allele in the present GWAS. **B)** The tissue expression of *LEXM/C1orf177* in GTEx. Expression values are shown in Transcripts Per Million (TPM; y-axis) calculated from a model with isoforms collapsed to a single gene. The tissues are ordered according to the gene expression median (x-axis). **C)** Expression level of *LEXM/C1orf177* in Braineac database (upper) and *LEXM/C1orf177* expression stratified according to rs588709 genotype (lower) (braineac.org; accessed on April 15<sup>th</sup>, 2019). MEDU, medulla; WHMT, intralobular white matter; SNIG, substantia nigra; FCTX, frontal cortex; THAL, thalamus; HIPP, hippocampus; TCTX, temporal cortex; OCTX, occipital cortex; PUTM, putamen; CRBL, cerebellar cortex.

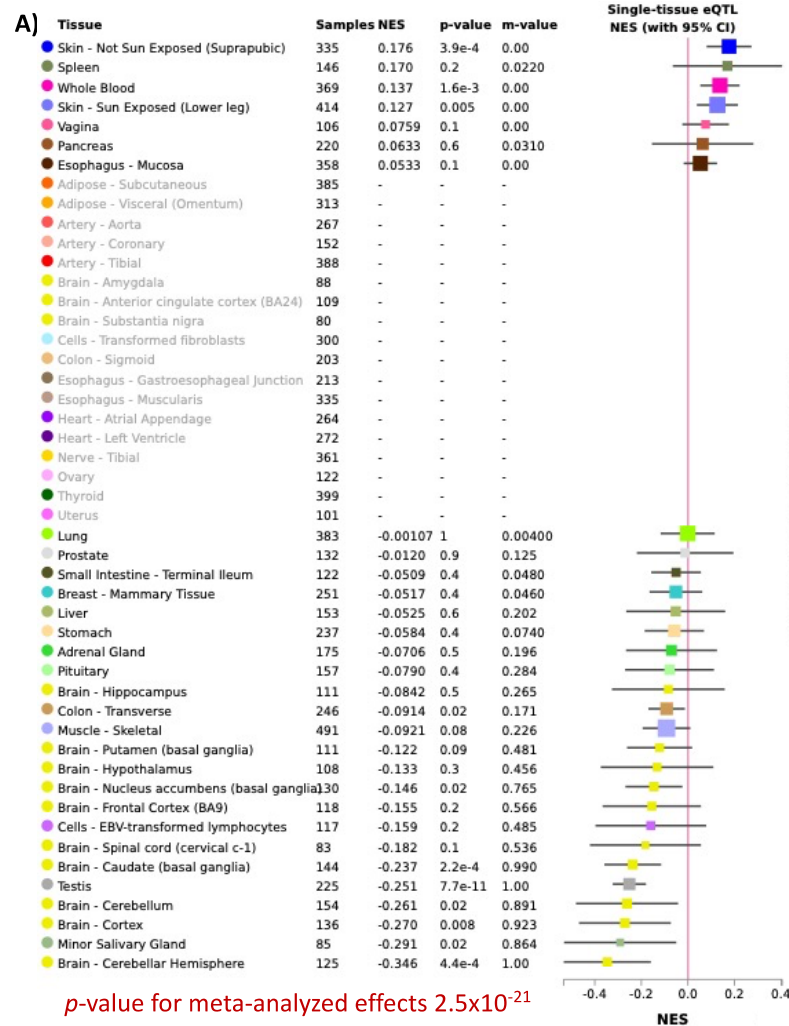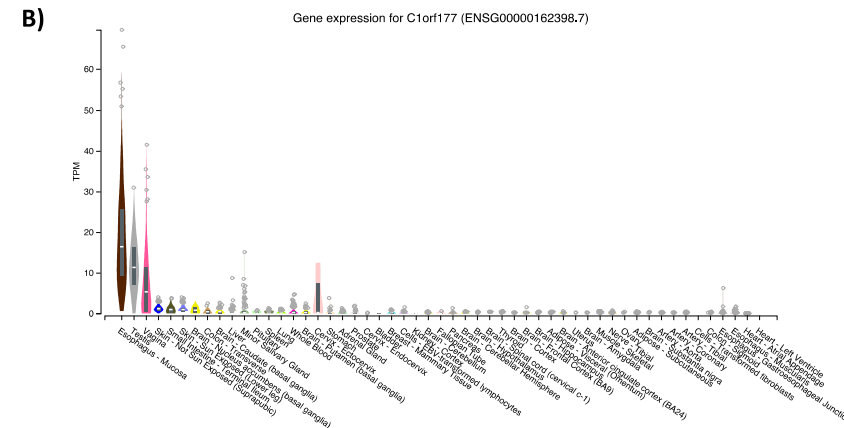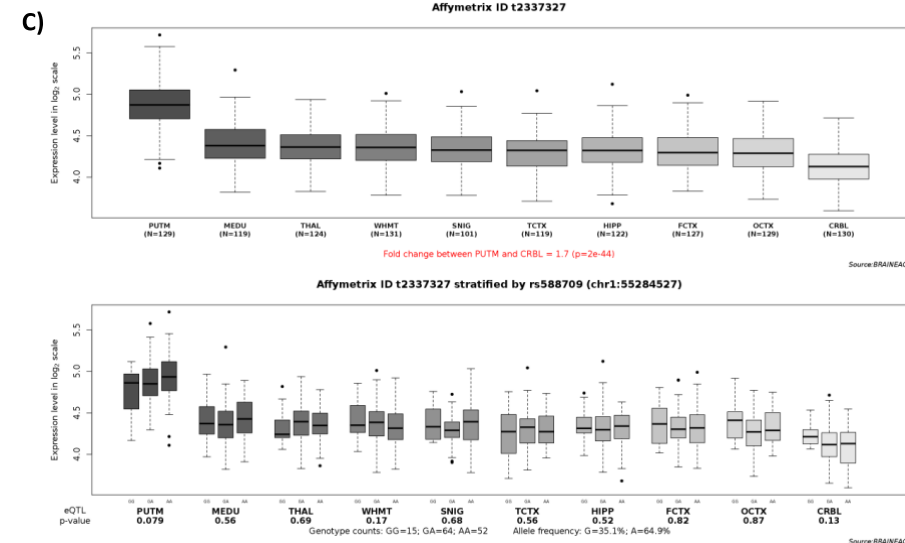

**Figure S5. RP11-67L3.4 expression summarized.**

**A)** The effect of the GWAS-lead variant rs588709 on RP11-67L3.4 gene expression was studied in GTEx portal (accessed on April 15<sup>th</sup>, 2019) (17). ‘Samples’ indicate the number of RNA-seq samples with genotype. Normalized effect size (NES) is the slope of the linear regression of the normalized data versus the three genotype categories using single-tissue expression quantitative trait locus (eQTL) analysis, representing eQTL effect size. The ‘p-value’ originates from a t-test that compares observed NES from single-tissue eQTL analysis to a null NES of 0. The ‘m-value’ indicates the posterior probability that an eQTL effect exists in each tissue tested in the cross-tissue meta-analysis. The effect estimates are for the G allele that was the effect allele in the present GWAS. **B)** The tissue expression of RP11-67L3.4 in GTEx. Expression values are shown in Transcripts Per Million (TPM; y-axis) calculated from a model with isoforms collapsed to a single gene. The tissues are ordered according to the gene expression median (x-axis). **C)** RP11-67L3.4 was not found in Braineac database (braineac.org; accessed on April 15<sup>th</sup>, 2019).

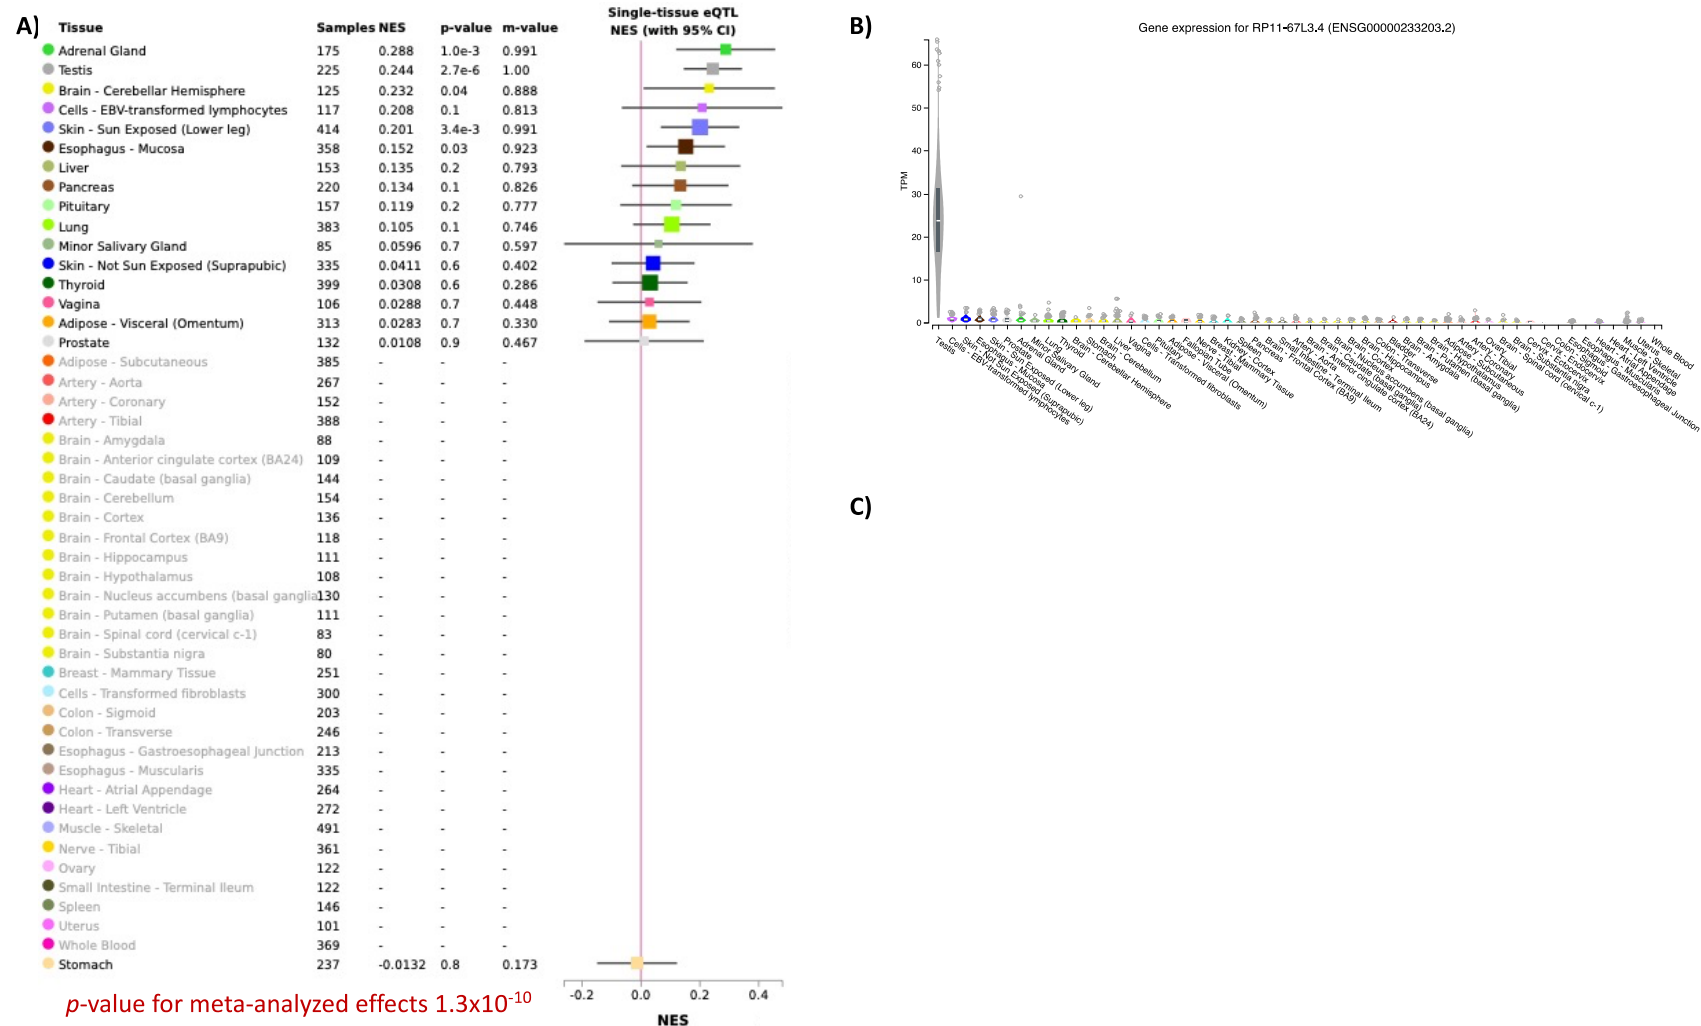

Figure S6. Expression of A) *DHCR24*, B) *TTC22*, and C) *LEXM/C1orf177* in the brain during lifespan.

Cerebrocortical mRNA expression of the three genes was acquired from five post-mortem human databases (Allen Human Brain Atlas, ABHA; BrainCloud; BRAINEAC; BrainSpan; and GTEx) with a total of 572 donors. Within each database, mRNA expression was scaled by region and all scaled values were pooled by cortical lobe. Donor age (x-axis) was regressed on lobar expression (y-axis) adjusting for sex as a fixed effect and donor ID as a random effect. Colours indicate the database from which the expression data was obtained.

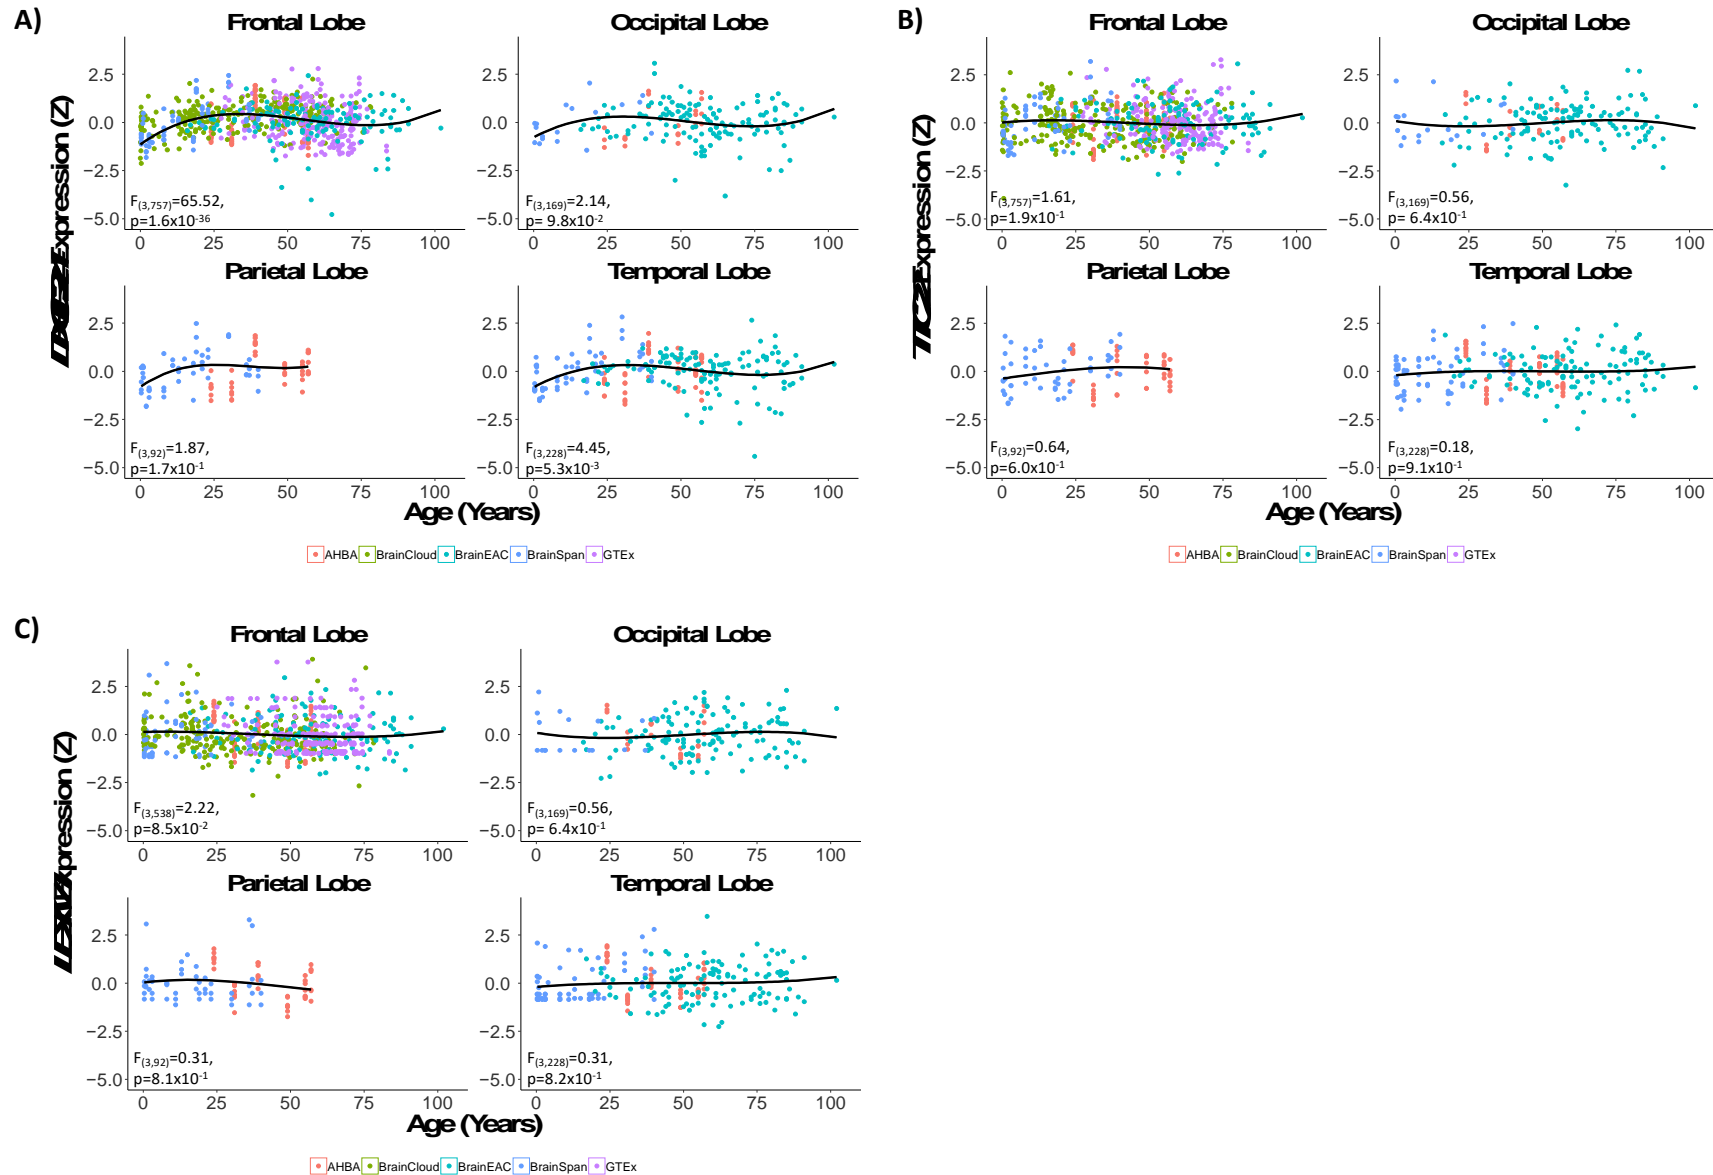



**Figure S7. A) Cell Type and B) Gene Ontology (GO) enrichment analysis with top 1% of genes co-expressed with *DHCR24*, *TTC22*, and *LEXM*.**

Cerebrocortical expression of *DHCR24*, *TTC22*, and *LEXM/C1orf177* mRNA was acquired from five post-mortem human databases (Allen Human Brain Atlas, ABHA; BrainCloud; BRAINEAC; BrainSpan; and GTEx) with a total of 572 donors. To study the co-expression of the three genes with all other 16,036 genes measured in each of the five databases, linear mixed models were fitted to adjust for age, sex, and repeated measures as random effect. The top 1% of positively co-expressed genes were then tested for enrichment with neural cell specific markers derived from PsychENCODE (adult) (14) and single-cell RNAseq data by Lake et al. (15). The same sets of co-expressed genes were used in GO analysis conducted using ToppGene (16). Red line represents Bonferroni-adjusted p-value threshold.

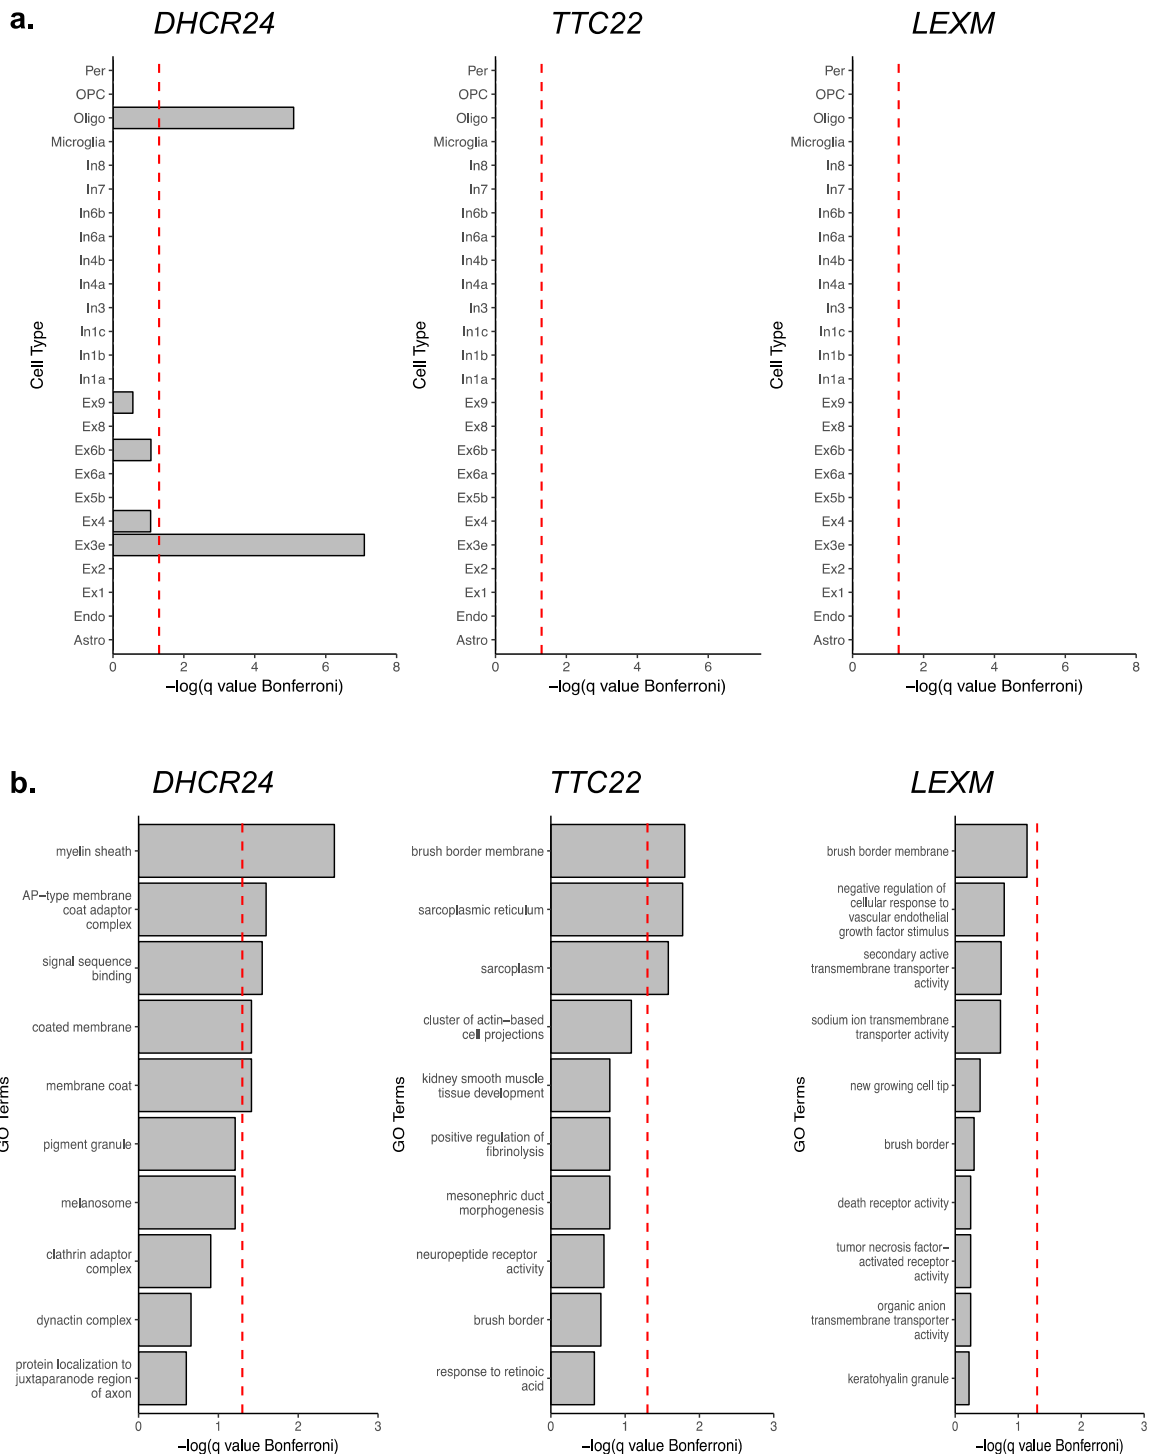

Figure S8. Genomic locations of rs588709 and the six CpG sites where DNA methylation associates with rs588709 in adolescence.

The variant rs588709 was found to be associated with the first principal component of visceral fat, circulating level of PC16:0/2:0 and T1W-SI of white-matter in the present study. Based on mQTLdb (mqtldb.org), the rs588709 genotype was found to be associated with DNA methylation at five CpG sites in childhood (labelled with 'C') and six CpG sites in adolescence (labelled with 'A'); the GWAS effect allele G associated with higher level of methylation at all the CpG sites (Table S1). Genomic locations correspond to the GRCh37/hg19 assembly.

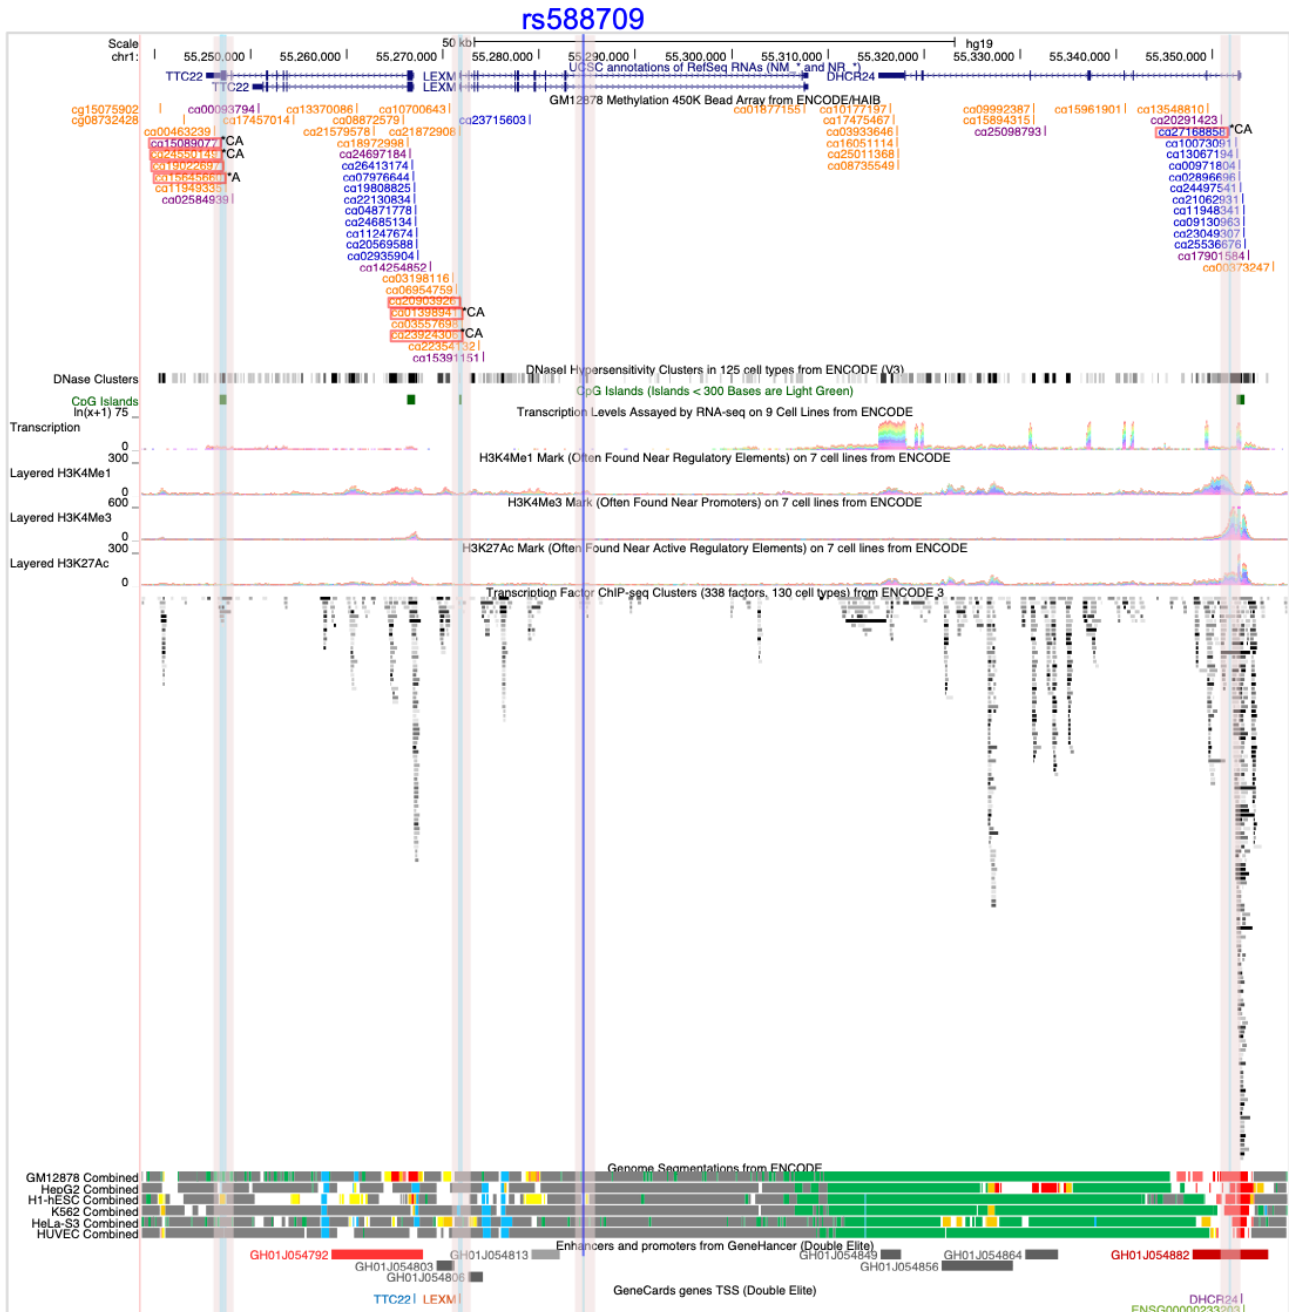



**Figure S10. Comparisons of the metabolic effects of *DHCR24*, *TM6SF2*, and *HMGCR* variants.**

Metabolomic association profile of *DHCR24* rs588709-G (yellow) in SYS adolescents was compared with metabolomic association profiles of *TM6SF2* rs58542926-T (turquoise) and *HMGCR* rs12916-T (gray) obtained from a published metabolomic GWAS (18). The NMR metabolomics platform used in the study by Kettunen *et al.* is an older quantification version of the platform used in the present study. The 111 metabolites available in both studies were compared. To overcome the differences in the effect sizes of the absolute effects, the effect estimates and corresponding 95% confidence intervals were scaled to a common factor that was the lowering effect on apolipoprotein B (ApoB) concentration. Metabolite abbreviations as in Table S3.

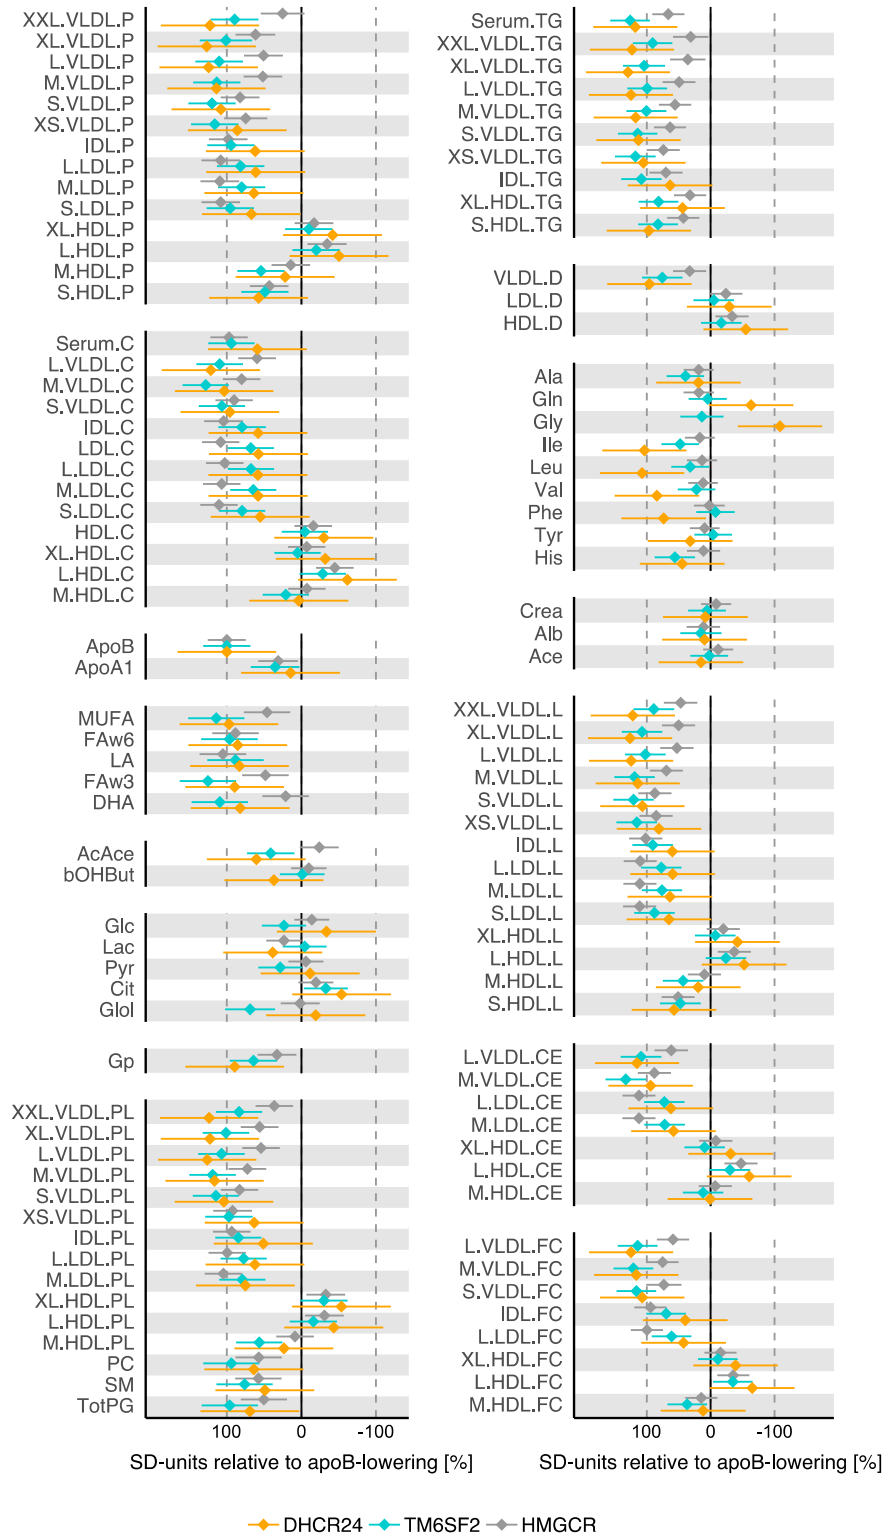

Table S1. DNA methylation in blood associating with rs588709 in mQTLdb.

| Timepoint   | SNP      | SNP Chr | SNP Pos  | A1 | A2 | MAF   | CpG        | CpG Chr | CpG Pos  | beta    | t-stat  | Effect Size | p-value  | Trans |
|-------------|----------|---------|----------|----|----|-------|------------|---------|----------|---------|---------|-------------|----------|-------|
| Pregnancy   | rs588709 | 1       | 55284527 | G  | A  | 0.352 | cg23924306 | 1       | 55271927 | 0.30622 | 6.85474 | 0.01439     | 1.48E-11 | N     |
| Pregnancy   | rs588709 | 1       | 55284527 | G  | A  | 0.352 | cg01398941 | 1       | 55271902 | 0.27853 | 5.81536 | 0.00653     | 8.90E-09 | N     |
| Pregnancy   | rs588709 | 1       | 55284527 | G  | A  | 0.352 | cg15645660 | 1       | 55247356 | 0.25334 | 5.42319 | 0.01216     | 7.87E-08 | N     |
| Pregnancy   | rs588709 | 1       | 55284527 | G  | A  | 0.352 | cg19022697 | 1       | 55247140 | 0.26495 | 5.60981 | 0.02961     | 2.83E-08 | N     |
| Birth       | rs588709 | 1       | 55284527 | G  | A  | 0.345 | cg23924306 | 1       | 55271927 | 0.30239 | 6.773   | 0.02311     | 2.51E-11 | N     |
| Birth       | rs588709 | 1       | 55284527 | G  | A  | 0.345 | cg20903926 | 1       | 55271677 | 0.27255 | 5.98808 | 0.08344     | 3.26E-09 | N     |
| Childhood   | rs588709 | 1       | 55284527 | G  | A  | 0.34  | cg15089077 | 1       | 55246867 | 0.28751 | 6.36037 | 0.01114     | 3.32E-10 | N     |
| Childhood   | rs588709 | 1       | 55284527 | G  | A  | 0.34  | cg24550149 | 1       | 55246954 | 0.26061 | 5.97309 | 0.02648     | 3.45E-09 | N     |
| Childhood   | rs588709 | 1       | 55284527 | G  | A  | 0.34  | cg27168858 | 1       | 55351659 | 0.28628 | 6.87681 | 0.04399     | 1.20E-11 | N     |
| Childhood   | rs588709 | 1       | 55284527 | G  | A  | 0.34  | cg23924306 | 1       | 55271927 | 0.28162 | 6.678   | 0.01203     | 4.43E-11 | N     |
| Childhood   | rs588709 | 1       | 55284527 | G  | A  | 0.34  | cg01398941 | 1       | 55271902 | 0.29735 | 6.81195 | 0.00821     | 1.85E-11 | N     |
| Adolescence | rs588709 | 1       | 55284527 | G  | A  | 0.34  | cg24550149 | 1       | 55246954 | 0.26757 | 5.85618 | 0.02491     | 6.81E-09 | N     |
| Adolescence | rs588709 | 1       | 55284527 | G  | A  | 0.34  | cg15645660 | 1       | 55247356 | 0.25295 | 5.55413 | 0.02714     | 3.75E-08 | N     |
| Adolescence | rs588709 | 1       | 55284527 | G  | A  | 0.34  | cg01398941 | 1       | 55271902 | 0.30548 | 6.98018 | 0.0059      | 6.01E-12 | N     |
| Adolescence | rs588709 | 1       | 55284527 | G  | A  | 0.34  | cg15089077 | 1       | 55246867 | 0.26822 | 5.89339 | 0.01469     | 5.49E-09 | N     |
| Adolescence | rs588709 | 1       | 55284527 | G  | A  | 0.34  | cg27168858 | 1       | 55351659 | 0.24063 | 5.46697 | 0.01988     | 6.05E-08 | N     |
| Adolescence | rs588709 | 1       | 55284527 | G  | A  | 0.34  | cg23924306 | 1       | 55271927 | 0.29716 | 7.01128 | 0.00838     | 4.87E-12 | N     |
| Middle Age  | rs588709 | 1       | 55284527 | G  | A  | 0.359 | cg23924306 | 1       | 55271927 | 0.26017 | 5.70002 | 0.01218     | 1.73E-08 | N     |

Table S2. Regulatory motifs altered by rs588709 as reported in HaploReg.

| <b>Position Weight Matrix ID</b>           |        |         |         | Match on:                                                            |                                                                      |
|--------------------------------------------|--------|---------|---------|----------------------------------------------------------------------|----------------------------------------------------------------------|
| (Library from Kheradpour and Kellis, 2013) | Strand | Ref (A) | Alt (G) | Ref:                                                                 | Alt:                                                                 |
| lk-1_2                                     | -      | 12.1    | 10.7    | TCAAGCAATCTGCCTGTCTCAGCCTCCCA <b>A</b> CGTGCTGGGATTACAGGTGTGAGCCACTG | TCAAGCAATCTGCCTGTCTCAGCCTCCCA <b>G</b> CGTGCTGGGATTACAGGTGTGAGCCACTG |
| NRSF_disc10                                | +      | 13.3    | 1.3     |                                                                      | YYYCCYARM                                                            |
| SETDB1_disc1                               | -      | 5       | 8.8     |                                                                      | AAGGWGCTS                                                            |
| SP1_known3                                 | -      | 0.3     | 10.6    |                                                                      | RRACTACMWYTYCCRKVRDKCHNYG                                            |
| Znf143_disc3                               | +      | 7       | 12      |                                                                      | CCCYSCMSMMKKST                                                       |
|                                            |        |         |         |                                                                      | GSVBBSBGGGVVNBGBRGB                                                  |

Table S3. Metabolite mean concentrations and associations with rs588709 in SYS adolescents

| Metabolic measure<br>(abbreviation)                        | Summary of metabolic measures<br>in SYS adolescents |          |        |     | Association with rs588709<br>(in standard deviation units) |        |        |         | Rate of<br>corroboration |
|------------------------------------------------------------|-----------------------------------------------------|----------|--------|-----|------------------------------------------------------------|--------|--------|---------|--------------------------|
|                                                            | mean                                                | sd       | unit   | n   | beta                                                       | CI95L  | CI95U  | p       |                          |
| <i><b>Lipoprotein subclass particle concentrations</b></i> |                                                     |          |        |     |                                                            |        |        |         |                          |
| XXL VLDL (XXL.VLDL.P)                                      | 7.6E-11                                             | 8.65E-11 | mol/l  | 931 | -0.178                                                     | -0.274 | -0.082 | 0.00028 | 0.640                    |
| XL VLDL (XL.VLDL.P)                                        | 3.8E-10                                             | 4.85E-10 | mol/l  | 931 | -0.184                                                     | -0.280 | -0.089 | 0.00017 | 0.696                    |
| L VLDL (L.VLDL.P)                                          | 2.9E-09                                             | 2.77E-09 | mol/l  | 931 | -0.181                                                     | -0.276 | -0.085 | 0.00023 | 0.662                    |
| M VLDL (M.VLDL.P)                                          | 1.3E-08                                             | 6.78E-09 | mol/l  | 931 | -0.165                                                     | -0.261 | -0.070 | 0.00074 | 0.468                    |
| S VLDL (S.VLDL.P)                                          | 2.2E-08                                             | 7.81E-09 | mol/l  | 931 | -0.157                                                     | -0.253 | -0.061 | 0.0014  | 0.349                    |
| XS VLDL (XS.VLDL.P)                                        | 2.9E-08                                             | 7.06E-09 | mol/l  | 931 | -0.125                                                     | -0.221 | -0.029 | 0.011   | 0                        |
| IDL (IDL.P)                                                | 7.9E-08                                             | 2.00E-08 | mol/l  | 931 | -0.090                                                     | -0.186 | 0.006  | 0.068   | 0                        |
| L LDL (L.LDL.P)                                            | 1.3E-07                                             | 3.55E-08 | mol/l  | 931 | -0.089                                                     | -0.185 | 0.007  | 0.070   | 0                        |
| M LDL (M.LDL.P)                                            | 1.0E-07                                             | 3.04E-08 | mol/l  | 931 | -0.093                                                     | -0.189 | 0.004  | 0.059   | 0                        |
| S LDL (S.LDL.P)                                            | 1.2E-07                                             | 3.38E-08 | mol/l  | 931 | -0.097                                                     | -0.194 | -0.001 | 0.048   | 0                        |
| XL HDL (XL.HDL.P)                                          | 3.7E-07                                             | 1.70E-07 | mol/l  | 931 | 0.061                                                      | -0.036 | 0.157  | 0.217   | 0                        |
| L HDL (L.HDL.P)                                            | 1.0E-06                                             | 4.14E-07 | mol/l  | 931 | 0.073                                                      | -0.023 | 0.169  | 0.137   | 0                        |
| M HDL (M.HDL.P)                                            | 1.8E-06                                             | 3.37E-07 | mol/l  | 931 | -0.032                                                     | -0.128 | 0.065  | 0.519   | 0                        |
| S HDL (S.HDL.P)                                            | 4.6E-06                                             | 4.57E-07 | mol/l  | 931 | -0.083                                                     | -0.180 | 0.013  | 0.089   | 0                        |
| <i><b>Cholesterol in</b></i>                               |                                                     |          |        |     |                                                            |        |        |         |                          |
| Serum total (Serum.C)                                      | 3.420                                               | 0.714    | mmol/l | 931 | -0.086                                                     | -0.182 | 0.011  | 0.081   | 0                        |
| Remnants (Remnant.C)                                       | 0.975                                               | 0.294    | mmol/l | 931 | -0.134                                                     | -0.230 | -0.038 | 0.0064  | 0.002                    |
| VLDL total (VLDL.C)                                        | 0.472                                               | 0.186    | mmol/l | 931 | -0.148                                                     | -0.244 | -0.052 | 0.0026  | 0.193                    |
| XXL VLDL (XXL.VLDL.C)                                      | 0.0024                                              | 0.0032   | mmol/l | 931 | -0.173                                                     | -0.269 | -0.078 | 0.00041 | 0.586                    |
| XL VLDL (XL.VLDL.C)                                        | 0.0070                                              | 0.0094   | mmol/l | 931 | -0.175                                                     | -0.271 | -0.080 | 0.00035 | 0.615                    |
| L VLDL (L.VLDL.C)                                          | 0.036                                               | 0.037    | mmol/l | 931 | -0.176                                                     | -0.272 | -0.081 | 0.00032 | 0.618                    |
| M VLDL (M.VLDL.C)                                          | 0.104                                               | 0.060    | mmol/l | 931 | -0.150                                                     | -0.246 | -0.054 | 0.0022  | 0.250                    |
| S VLDL (S.VLDL.C)                                          | 0.141                                               | 0.055    | mmol/l | 931 | -0.139                                                     | -0.235 | -0.043 | 0.0046  | 0.054                    |
| XS VLDL (XS.VLDL.C)                                        | 0.180                                               | 0.046    | mmol/l | 931 | -0.101                                                     | -0.197 | -0.004 | 0.041   | 0                        |
| IDL (IDL.C)                                                | 0.503                                               | 0.140    | mmol/l | 931 | -0.084                                                     | -0.181 | 0.012  | 0.086   | 0                        |
| LDL total (LDL.C)                                          | 1.158                                               | 0.373    | mmol/l | 931 | -0.084                                                     | -0.180 | 0.013  | 0.089   | 0                        |
| L LDL (L.LDL.C)                                            | 0.609                                               | 0.188    | mmol/l | 931 | -0.085                                                     | -0.181 | 0.012  | 0.085   | 0                        |
| M LDL (M.LDL.C)                                            | 0.340                                               | 0.117    | mmol/l | 931 | -0.084                                                     | -0.181 | 0.012  | 0.086   | 0                        |
| S LDL (S.LDL.C)                                            | 0.208                                               | 0.070    | mmol/l | 931 | -0.080                                                     | -0.176 | 0.016  | 0.103   | 0                        |
| HDL total (HDL.C)                                          | 1.287                                               | 0.261    | mmol/l | 931 | 0.043                                                      | -0.053 | 0.140  | 0.377   | 0                        |
| HDL <sub>2</sub> (HDL2.C)                                  | 0.820                                               | 0.242    | mmol/l | 931 | 0.049                                                      | -0.047 | 0.145  | 0.319   | 0                        |
| HDL <sub>3</sub> (HDL3.C)                                  | 0.467                                               | 0.025    | mmol/l | 931 | -0.024                                                     | -0.120 | 0.073  | 0.630   | 0                        |
| XL HDL (XL.HDL.C)                                          | 0.176                                               | 0.080    | mmol/l | 931 | 0.046                                                      | -0.050 | 0.143  | 0.346   | 0                        |
| L HDL (L.HDL.C)                                            | 0.311                                               | 0.140    | mmol/l | 931 | 0.090                                                      | -0.007 | 0.186  | 0.068   | 0                        |
| M HDL (M.HDL.C)                                            | 0.388                                               | 0.076    | mmol/l | 931 | -0.005                                                     | -0.101 | 0.091  | 0.918   | 0                        |
| S HDL (S.HDL.C)                                            | 0.409                                               | 0.050    | mmol/l | 931 | -0.056                                                     | -0.152 | 0.040  | 0.256   | 0                        |

| <b><i>Triglycerides in</i></b>                          |        |        |        |     |        |        |        |         |       |
|---------------------------------------------------------|--------|--------|--------|-----|--------|--------|--------|---------|-------|
| <b>Serum total</b> (Serum.TG)                           | 0.927  | 0.395  | mmol/l | 931 | -0.171 | -0.267 | -0.076 | 0.00048 | 0.538 |
| <b>VLDL total</b> (VLDL.TG)                             | 0.631  | 0.340  | mmol/l | 931 | -0.170 | -0.266 | -0.075 | 0.00051 | 0.516 |
| <b>XXL VLDL</b> (XXL.VLDL.TG)                           | 0.012  | 0.013  | mmol/l | 931 | -0.179 | -0.275 | -0.083 | 0.00026 | 0.655 |
| <b>XL VLDL</b> (XL.VLDL.TG)                             | 0.024  | 0.030  | mmol/l | 931 | -0.188 | -0.284 | -0.092 | 0.00013 | 0.739 |
| <b>L VLDL</b> (L.VLDL.TG)                               | 0.101  | 0.095  | mmol/l | 931 | -0.181 | -0.277 | -0.085 | 0.00022 | 0.674 |
| <b>M VLDL</b> (M.VLDL.TG)                               | 0.228  | 0.124  | mmol/l | 931 | -0.170 | -0.266 | -0.075 | 0.00051 | 0.531 |
| <b>S VLDL</b> (S.VLDL.TG)                               | 0.181  | 0.070  | mmol/l | 931 | -0.164 | -0.260 | -0.068 | 0.00083 | 0.450 |
| <b>XS VLDL</b> (XS.VLDL.TG)                             | 0.079  | 0.023  | mmol/l | 931 | -0.153 | -0.249 | -0.057 | 0.0018  | 0.279 |
| <b>IDL</b> (IDL.TG)                                     | 0.077  | 0.021  | mmol/l | 931 | -0.092 | -0.188 | 0.004  | 0.061   | 0     |
| <b>LDL total</b> (LDL.TG)                               | 0.110  | 0.036  | mmol/l | 931 | -0.085 | -0.181 | 0.012  | 0.086   | 0     |
| <b>L LDL</b> (L.LDL.TG)                                 | 0.062  | 0.020  | mmol/l | 931 | -0.075 | -0.171 | 0.021  | 0.128   | 0     |
| <b>M LDL</b> (M.LDL.TG)                                 | 0.029  | 0.010  | mmol/l | 931 | -0.068 | -0.164 | 0.028  | 0.166   | 0     |
| <b>S LDL</b> (S.LDL.TG)                                 | 0.019  | 0.0069 | mmol/l | 931 | -0.131 | -0.227 | -0.035 | 0.0076  | 0     |
| <b>HDL total</b> (HDL.TG)                               | 0.110  | 0.031  | mmol/l | 931 | -0.117 | -0.213 | -0.021 | 0.017   | 0     |
| <b>XL HDL</b> (XL.HDL.TG)                               | 0.0099 | 0.0058 | mmol/l | 931 | -0.064 | -0.160 | 0.032  | 0.193   | 0     |
| <b>L HDL</b> (L.HDL.TG)                                 | 0.022  | 0.011  | mmol/l | 931 | -0.010 | -0.106 | 0.087  | 0.843   | 0     |
| <b>M HDL</b> (M.HDL.TG)                                 | 0.036  | 0.012  | mmol/l | 931 | -0.114 | -0.210 | -0.018 | 0.021   | 0     |
| <b>S HDL</b> (S.HDL.TG)                                 | 0.042  | 0.011  | mmol/l | 931 | -0.140 | -0.236 | -0.044 | 0.0042  | 0.073 |
| <b><i>Phospholipids in</i></b>                          |        |        |        |     |        |        |        |         |       |
| <b>XXL VLDL</b> (XXL.VLDL.PL)                           | 0.0016 | 0.0022 | mmol/l | 931 | -0.180 | -0.275 | -0.084 | 0.00025 | 0.658 |
| <b>XL VLDL</b> (XL.VLDL.PL)                             | 0.0052 | 0.0076 | mmol/l | 931 | -0.178 | -0.274 | -0.082 | 0.00028 | 0.639 |
| <b>L VLDL</b> (L.VLDL.PL)                               | 0.028  | 0.029  | mmol/l | 931 | -0.183 | -0.279 | -0.088 | 0.00019 | 0.685 |
| <b>M VLDL</b> (M.VLDL.PL)                               | 0.083  | 0.043  | mmol/l | 931 | -0.169 | -0.265 | -0.073 | 0.00057 | 0.511 |
| <b>S VLDL</b> (S.VLDL.PL)                               | 0.101  | 0.033  | mmol/l | 931 | -0.151 | -0.247 | -0.055 | 0.0021  | 0.248 |
| <b>XS VLDL</b> (XS.VLDL.PL)                             | 0.107  | 0.028  | mmol/l | 931 | -0.092 | -0.188 | 0.004  | 0.061   | 0     |
| <b>IDL</b> (IDL.PL)                                     | 0.224  | 0.053  | mmol/l | 931 | -0.074 | -0.170 | 0.022  | 0.132   | 0     |
| <b>L LDL</b> (L.LDL.PL)                                 | 0.248  | 0.054  | mmol/l | 931 | -0.090 | -0.187 | 0.006  | 0.066   | 0     |
| <b>M LDL</b> (M.LDL.PL)                                 | 0.153  | 0.032  | mmol/l | 931 | -0.109 | -0.205 | -0.013 | 0.026   | 0     |
| <b>S LDL</b> (S.LDL.PL)                                 | 0.114  | 0.021  | mmol/l | 931 | -0.110 | -0.206 | -0.014 | 0.025   | 0     |
| <b>XL HDL</b> (XL.HDL.PL)                               | 0.189  | 0.092  | mmol/l | 931 | 0.078  | -0.018 | 0.174  | 0.113   | 0     |
| <b>L HDL</b> (L.HDL.PL)                                 | 0.307  | 0.117  | mmol/l | 931 | 0.063  | -0.033 | 0.159  | 0.199   | 0     |
| <b>M HDL</b> (M.HDL.PL)                                 | 0.358  | 0.066  | mmol/l | 931 | -0.034 | -0.130 | 0.062  | 0.490   | 0     |
| <b>S HDL</b> (S.HDL.PL)                                 | 0.566  | 0.061  | mmol/l | 931 | -0.071 | -0.167 | 0.026  | 0.150   | 0     |
| <b>Total cholines</b> (TotCho)                          | 1.858  | 0.319  | mmol/l | 931 | -0.097 | -0.194 | -0.001 | 0.047   | 0     |
| <b>Phosphatidylcholine</b> (PC)                         | 1.531  | 0.297  | mmol/l | 931 | -0.093 | -0.189 | 0.004  | 0.059   | 0     |
| <b>Sphingomyelins</b> (SM)                              | 0.330  | 0.062  | mmol/l | 931 | -0.071 | -0.168 | 0.025  | 0.147   | 0     |
| <b>Phosphoglycerides</b> (TotPG)                        | 1.480  | 0.307  | mmol/l | 931 | -0.100 | -0.196 | -0.004 | 0.041   | 0     |
| <b>Triglycerides to phosphoglycerides ratio</b> (TG.PG) | 0.526  | 0.212  | ratio  | 931 | -0.143 | -0.239 | -0.047 | 0.0035  | 0.093 |



| <b><u>Average particle diameter of</u></b>   |       |        |        |     |        |        |        |        |       |
|----------------------------------------------|-------|--------|--------|-----|--------|--------|--------|--------|-------|
| <b>VLDL (VLDL.D)</b>                         | 36.5  | 1.249  | nm     | 931 | -0.139 | -0.235 | -0.043 | 0.0046 | 0.050 |
| <b>LDL (LDL.D)</b>                           | 23.6  | 0.105  | nm     | 931 | 0.042  | -0.054 | 0.139  | 0.389  | 0     |
| <b>HDL (HDL.D)</b>                           | 9.9   | 0.229  | nm     | 931 | 0.080  | -0.016 | 0.176  | 0.104  | 0     |
| <b><u>Apolipoproteins</u></b>                |       |        |        |     |        |        |        |        |       |
| <b>Apolipoprotein B (ApoB)</b>               | 0.681 | 0.146  | g/l    | 931 | -0.145 | -0.241 | -0.049 | 0.0031 | 0.149 |
| <b>Apolipoprotein A-I (ApoA1)</b>            | 1.363 | 0.162  | g/l    | 931 | -0.021 | -0.117 | 0.075  | 0.668  | 0     |
| <b>ApoB to ApoA1 ratio (ApoB.ApoA1)</b>      | 0.503 | 0.108  | ratio  | 931 | -0.134 | -0.230 | -0.038 | 0.0062 | 0.003 |
| <b><u>Fatty acids</u></b>                    |       |        |        |     |        |        |        |        |       |
| <b>Total fatty acids (TotFA)</b>             | 8.741 | 1.892  | mmol/l | 928 | -0.145 | -0.241 | -0.049 | 0.0031 | 0.154 |
| <b>Saturated fatty acids (SFA)</b>           | 3.150 | 0.695  | mmol/l | 928 | -0.142 | -0.238 | -0.046 | 0.0038 | 0.099 |
| <b>Monounsaturated fatty acids (MUFA)</b>    | 2.286 | 0.655  | mmol/l | 928 | -0.141 | -0.237 | -0.045 | 0.0041 | 0.072 |
| <b>Polyunsaturated fatty acids (PUFA)</b>    | 3.305 | 0.635  | mmol/l | 928 | -0.128 | -0.225 | -0.032 | 0.0090 | 0     |
| <b>Omega-6 fatty acids (FAw6)</b>            | 3.033 | 0.557  | mmol/l | 928 | -0.124 | -0.220 | -0.028 | 0.012  | 0     |
| <b>Linoleic acid (LA)</b>                    | 2.549 | 0.495  | mmol/l | 928 | -0.121 | -0.217 | -0.024 | 0.014  | 0     |
| <b>Omega-3 fatty acids (FAw3)</b>            | 0.273 | 0.088  | mmol/l | 928 | -0.130 | -0.226 | -0.034 | 0.0082 | 0     |
| <b>Docosahexaenoic acid (DHA)</b>            | 0.074 | 0.031  | mmol/l | 928 | -0.119 | -0.216 | -0.023 | 0.015  | 0     |
| <b><u>Fatty acid ratios</u></b>              |       |        |        |     |        |        |        |        |       |
| <b>SFA to total FA ratio (SFA.FA)</b>        | 36.0  | 1.972  | %      | 928 | 0.001  | -0.096 | 0.097  | 0.988  | 0     |
| <b>MUFA to total FA ratio (MUFA.FA)</b>      | 25.9  | 2.662  | %      | 928 | -0.084 | -0.180 | 0.013  | 0.089  | 0     |
| <b>PUFA to total FA ratio (PUFA.FA)</b>      | 38.0  | 2.881  | %      | 928 | 0.089  | -0.007 | 0.185  | 0.070  | 0     |
| <b>FAw6 to total FA ratio (FAw6.FA)</b>      | 34.9  | 2.770  | %      | 928 | 0.107  | 0.011  | 0.204  | 0.029  | 0     |
| <b>LA to total FA ratio (LA.FA)</b>          | 29.4  | 2.773  | %      | 928 | 0.076  | -0.020 | 0.172  | 0.122  | 0     |
| <b>FAw3 to total FA ratio (FAw3.FA)</b>      | 3.076 | 0.532  | %      | 928 | -0.058 | -0.154 | 0.039  | 0.241  | 0     |
| <b>DHA to total FA ratio (DHA.FA)</b>        | 0.833 | 0.243  | %      | 928 | -0.069 | -0.166 | 0.027  | 0.158  | 0     |
| <b>Degree of unsaturation (UnSat)</b>        | 1.210 | 0.061  |        | 928 | 0.087  | -0.009 | 0.184  | 0.076  | 0     |
| <b><u>Amino acids</u></b>                    |       |        |        |     |        |        |        |        |       |
| <b>Alanine (Ala)</b>                         | 0.378 | 0.054  | mmol/l | 931 | -0.028 | -0.124 | 0.069  | 0.575  | 0     |
| <b>Glutamine (Gln)</b>                       | 0.492 | 0.064  | mmol/l | 931 | 0.092  | -0.004 | 0.188  | 0.062  | 0     |
| <b>Glycine (Gly)</b>                         | 0.273 | 0.049  | mmol/l | 931 | 0.158  | 0.062  | 0.253  | 0.0013 | 0.346 |
| <b>Isoleucine (Ile)</b>                      | 0.049 | 0.011  | mmol/l | 931 | -0.150 | -0.246 | -0.054 | 0.0022 | 0.255 |
| <b>Leucine (Leu)</b>                         | 0.069 | 0.013  | mmol/l | 931 | -0.156 | -0.252 | -0.060 | 0.0015 | 0.325 |
| <b>Valine (Val)</b>                          | 0.147 | 0.027  | mmol/l | 931 | -0.122 | -0.218 | -0.026 | 0.013  | 0     |
| <b>Phenylalanine (Phe)</b>                   | 0.065 | 0.0081 | mmol/l | 931 | -0.107 | -0.203 | -0.011 | 0.030  | 0     |
| <b>Tyrosine (Tyr)</b>                        | 0.050 | 0.010  | mmol/l | 931 | -0.047 | -0.143 | 0.050  | 0.342  | 0     |
| <b>Histidine (His)</b>                       | 0.067 | 0.016  | mmol/l | 931 | -0.065 | -0.161 | 0.032  | 0.188  | 0     |
| <b><u>Glycolysis and gluconeogenesis</u></b> |       |        |        |     |        |        |        |        |       |
| <b>Glucose (Glc)</b>                         | 3.590 | 0.336  | mmol/l | 931 | 0.049  | -0.048 | 0.145  | 0.322  | 0     |
| <b>Lactate (Lac)</b>                         | 1.593 | 0.393  | mmol/l | 931 | -0.056 | -0.152 | 0.041  | 0.256  | 0     |
| <b>Pyruvate (Pyr)</b>                        | 0.073 | 0.024  | mmol/l | 931 | 0.017  | -0.079 | 0.113  | 0.731  | 0     |
| <b>Citrate (Cit)</b>                         | 0.116 | 0.036  | mmol/l | 931 | 0.078  | -0.018 | 0.175  | 0.111  | 0     |

|                                     |         |        |        |     |        |        |        |         |       |
|-------------------------------------|---------|--------|--------|-----|--------|--------|--------|---------|-------|
| <b>Glycerol (GloI)</b>              | 0.078   | 0.032  | mmol/l | 927 | 0.028  | -0.069 | 0.124  | 0.572   | 0     |
| <b><u>Ketone bodies</u></b>         |         |        |        |     |        |        |        |         |       |
| <b>Acetoacetate (AcAce)</b>         | 0.040   | 0.033  | mmol/l | 931 | -0.088 | -0.184 | 0.008  | 0.074   | 0     |
| <b>β-hydroxybutyrate (bOHBut)</b>   | 0.120   | 0.069  | mmol/l | 931 | -0.054 | -0.150 | 0.043  | 0.276   | 0     |
| <b><u>Miscellaneous</u></b>         |         |        |        |     |        |        |        |         |       |
| <b>Creatinine (Crea)</b>            | 0.050   | 0.0087 | mmol/l | 931 | -0.012 | -0.108 | 0.084  | 0.808   | 0     |
| <b>Albumin (Alb)</b>                | 0.089   | 0.0054 | cu     | 931 | -0.014 | -0.110 | 0.083  | 0.778   | 0     |
| <b>Acetate (Ace)</b>                | 0.038   | 0.0067 | mmol/l | 931 | -0.022 | -0.119 | 0.074  | 0.652   | 0     |
| <b><u>Inflammation</u></b>          |         |        |        |     |        |        |        |         |       |
| <b>Glycoprotein acetyls (Gp)</b>    | 1.183   | 0.188  | mmol/l | 931 | -0.130 | -0.226 | -0.034 | 0.0081  | 0     |
| <b><u>Cholesteryl esters in</u></b> |         |        |        |     |        |        |        |         |       |
| <b>Serum total (EstC)</b>           | 2.414   | 0.513  | mmol/l | 931 | -0.086 | -0.183 | 0.010  | 0.079   | 0     |
| <b>XXL VLDL (XXL.VLDL.CE)</b>       | 0.0014  | 0.0018 | mmol/l | 931 | -0.164 | -0.259 | -0.068 | 0.00085 | 0.444 |
| <b>XL VLDL (XL.VLDL.CE)</b>         | 0.0042  | 0.0052 | mmol/l | 931 | -0.174 | -0.270 | -0.078 | 0.00039 | 0.587 |
| <b>L VLDL (L.VLDL.CE)</b>           | 0.022   | 0.019  | mmol/l | 931 | -0.167 | -0.263 | -0.072 | 0.00064 | 0.493 |
| <b>M VLDL (M.VLDL.CE)</b>           | 0.062   | 0.033  | mmol/l | 931 | -0.136 | -0.232 | -0.040 | 0.0054  | 0.018 |
| <b>S VLDL (S.VLDL.CE)</b>           | 0.086   | 0.036  | mmol/l | 931 | -0.126 | -0.222 | -0.030 | 0.010   | 0     |
| <b>XS VLDL (XS.VLDL.CE)</b>         | 0.123   | 0.032  | mmol/l | 931 | -0.100 | -0.196 | -0.004 | 0.042   | 0     |
| <b>IDL (IDL.CE)</b>                 | 0.360   | 0.101  | mmol/l | 931 | -0.094 | -0.190 | 0.002  | 0.055   | 0     |
| <b>L LDL (L.LDL.CE)</b>             | 0.425   | 0.143  | mmol/l | 931 | -0.091 | -0.187 | 0.006  | 0.065   | 0     |
| <b>M LDL (M.LDL.CE)</b>             | 0.230   | 0.095  | mmol/l | 931 | -0.084 | -0.181 | 0.012  | 0.086   | 0     |
| <b>S LDL (S.LDL.CE)</b>             | 0.142   | 0.057  | mmol/l | 931 | -0.079 | -0.175 | 0.017  | 0.109   | 0     |
| <b>XL HDL (XL.HDL.CE)</b>           | 0.129   | 0.057  | mmol/l | 931 | 0.046  | -0.051 | 0.142  | 0.355   | 0     |
| <b>L HDL (L.HDL.CE)</b>             | 0.245   | 0.107  | mmol/l | 931 | 0.088  | -0.009 | 0.184  | 0.075   | 0     |
| <b>M HDL (M.HDL.CE)</b>             | 0.321   | 0.059  | mmol/l | 931 | -0.001 | -0.098 | 0.095  | 0.977   | 0     |
| <b>S HDL (S.HDL.CE)</b>             | 0.306   | 0.044  | mmol/l | 931 | -0.047 | -0.143 | 0.050  | 0.343   | 0     |
| <b><u>Free cholesterol in</u></b>   |         |        |        |     |        |        |        |         |       |
| <b>Serum total (FreeC)</b>          | 1.006   | 0.204  | mmol/l | 931 | -0.090 | -0.186 | 0.007  | 0.068   | 0     |
| <b>XXL VLDL (XXL.VLDL.FC)</b>       | 0.00096 | 0.0014 | mmol/l | 931 | -0.181 | -0.276 | -0.085 | 0.00023 | 0.674 |
| <b>XL VLDL (XL.VLDL.FC)</b>         | 0.0028  | 0.0042 | mmol/l | 931 | -0.173 | -0.269 | -0.077 | 0.00042 | 0.583 |
| <b>L VLDL (L.VLDL.FC)</b>           | 0.014   | 0.018  | mmol/l | 931 | -0.181 | -0.277 | -0.085 | 0.00022 | 0.678 |
| <b>M VLDL (M.VLDL.FC)</b>           | 0.043   | 0.028  | mmol/l | 931 | -0.169 | -0.265 | -0.073 | 0.00057 | 0.511 |
| <b>S VLDL (S.VLDL.FC)</b>           | 0.055   | 0.021  | mmol/l | 931 | -0.155 | -0.251 | -0.060 | 0.0015  | 0.317 |
| <b>XS VLDL (XS.VLDL.FC)</b>         | 0.058   | 0.015  | mmol/l | 931 | -0.101 | -0.197 | -0.005 | 0.039   | 0     |
| <b>IDL (IDL.FC)</b>                 | 0.144   | 0.040  | mmol/l | 931 | -0.058 | -0.154 | 0.039  | 0.241   | 0     |
| <b>L LDL (L.LDL.FC)</b>             | 0.184   | 0.046  | mmol/l | 931 | -0.062 | -0.158 | 0.035  | 0.211   | 0     |
| <b>M LDL (M.LDL.FC)</b>             | 0.110   | 0.022  | mmol/l | 931 | -0.085 | -0.181 | 0.011  | 0.084   | 0     |
| <b>S LDL (S.LDL.FC)</b>             | 0.067   | 0.014  | mmol/l | 931 | -0.090 | -0.186 | 0.006  | 0.067   | 0     |
| <b>XL HDL (XL.HDL.FC)</b>           | 0.047   | 0.023  | mmol/l | 931 | 0.057  | -0.040 | 0.153  | 0.249   | 0     |
| <b>L HDL (L.HDL.FC)</b>             | 0.066   | 0.033  | mmol/l | 931 | 0.095  | -0.002 | 0.191  | 0.054   | 0     |
| <b>M HDL (M.HDL.FC)</b>             | 0.068   | 0.017  | mmol/l | 931 | -0.017 | -0.113 | 0.079  | 0.730   | 0     |
| <b>S HDL (S.HDL.FC)</b>             | 0.103   | 0.012  | mmol/l | 931 | -0.060 | -0.156 | 0.037  | 0.224   | 0     |

| <b><i>Total lipids in</i></b>                            |       |       |        |     |        |        |        |         |       |
|----------------------------------------------------------|-------|-------|--------|-----|--------|--------|--------|---------|-------|
| <b>XXL VLDL</b> (XXL.VLDL.L)                             | 0.016 | 0.018 | mmol/l | 931 | -0.177 | -0.273 | -0.081 | 0.00030 | 0.636 |
| <b>XL VLDL</b> (XL.VLDL.L)                               | 0.036 | 0.047 | mmol/l | 931 | -0.183 | -0.279 | -0.088 | 0.00019 | 0.687 |
| <b>L VLDL</b> (L.VLDL.L)                                 | 0.165 | 0.160 | mmol/l | 931 | -0.181 | -0.276 | -0.085 | 0.00023 | 0.671 |
| <b>M VLDL</b> (M.VLDL.L)                                 | 0.415 | 0.226 | mmol/l | 931 | -0.166 | -0.262 | -0.070 | 0.00072 | 0.472 |
| <b>S VLDL</b> (S.VLDL.L)                                 | 0.422 | 0.151 | mmol/l | 931 | -0.155 | -0.251 | -0.059 | 0.0016  | 0.322 |
| <b>XS VLDL</b> (XS.VLDL.L)                               | 0.366 | 0.090 | mmol/l | 931 | -0.118 | -0.214 | -0.022 | 0.017   | 0     |
| <b>IDL</b> (IDL.L)                                       | 0.804 | 0.206 | mmol/l | 931 | -0.087 | -0.183 | 0.009  | 0.077   | 0     |
| <b>L LDL</b> (L.LDL.L)                                   | 0.919 | 0.255 | mmol/l | 931 | -0.086 | -0.183 | 0.010  | 0.079   | 0     |
| <b>M LDL</b> (M.LDL.L)                                   | 0.522 | 0.154 | mmol/l | 931 | -0.092 | -0.189 | 0.004  | 0.060   | 0     |
| <b>S LDL</b> (S.LDL.L)                                   | 0.341 | 0.095 | mmol/l | 931 | -0.095 | -0.191 | 0.001  | 0.054   | 0     |
| <b>XL HDL</b> (XL.HDL.L)                                 | 0.375 | 0.173 | mmol/l | 931 | 0.061  | -0.035 | 0.157  | 0.214   | 0     |
| <b>L HDL</b> (L.HDL.L)                                   | 0.639 | 0.264 | mmol/l | 931 | 0.076  | -0.020 | 0.172  | 0.122   | 0     |
| <b>M HDL</b> (M.HDL.L)                                   | 0.782 | 0.145 | mmol/l | 931 | -0.028 | -0.125 | 0.068  | 0.564   | 0     |
| <b>S HDL</b> (S.HDL.L)                                   | 1.017 | 0.101 | mmol/l | 931 | -0.083 | -0.179 | 0.013  | 0.091   | 0     |
| <b><i>Total cholesterol to total lipids ratio in</i></b> |       |       |        |     |        |        |        |         |       |
| <b>XXL VLDL</b> (XXL.VLDL.Cpct)                          | 10.8  | 6.696 | %      | 816 | -0.106 | -0.210 | -0.003 | 0.045   | 0     |
| <b>XL VLDL</b> (XL.VLDL.Cpct)                            | 14.4  | 8.800 | %      | 806 | -0.034 | -0.138 | 0.070  | 0.520   | 0     |
| <b>L VLDL</b> (L.VLDL.Cpct)                              | 18.4  | 7.841 | %      | 870 | -0.093 | -0.193 | 0.007  | 0.067   | 0     |
| <b>M VLDL</b> (M.VLDL.Cpct)                              | 24.7  | 3.726 | %      | 929 | -0.020 | -0.116 | 0.076  | 0.684   | 0     |
| <b>S VLDL</b> (S.VLDL.Cpct)                              | 33.1  | 4.509 | %      | 930 | 0.010  | -0.087 | 0.106  | 0.843   | 0     |
| <b>XS VLDL</b> (XS.VLDL.Cpct)                            | 49.2  | 2.986 | %      | 931 | 0.058  | -0.038 | 0.155  | 0.234   | 0     |
| <b>IDL</b> (IDL.Cpct)                                    | 62.2  | 2.291 | %      | 931 | -0.034 | -0.130 | 0.063  | 0.494   | 0     |
| <b>L LDL</b> (L.LDL.Cpct)                                | 65.6  | 3.551 | %      | 931 | -0.038 | -0.134 | 0.059  | 0.445   | 0     |
| <b>M LDL</b> (M.LDL.Cpct)                                | 64.1  | 4.905 | %      | 931 | -0.026 | -0.122 | 0.070  | 0.598   | 0     |
| <b>S LDL</b> (S.LDL.Cpct)                                | 60.0  | 5.276 | %      | 930 | -0.017 | -0.113 | 0.080  | 0.734   | 0     |
| <b>XL HDL</b> (XL.HDL.Cpct)                              | 46.8  | 7.445 | %      | 925 | -0.058 | -0.154 | 0.039  | 0.240   | 0     |
| <b>L HDL</b> (L.HDL.Cpct)                                | 47.3  | 6.017 | %      | 927 | 0.110  | 0.014  | 0.206  | 0.026   | 0     |
| <b>M HDL</b> (M.HDL.Cpct)                                | 49.6  | 2.607 | %      | 931 | 0.110  | 0.014  | 0.206  | 0.025   | 0     |
| <b>S HDL</b> (S.HDL.Cpct)                                | 40.2  | 2.905 | %      | 931 | 0.025  | -0.072 | 0.121  | 0.616   | 0     |
| <b><i>Triglycerides to total lipids ratio in</i></b>     |       |       |        |     |        |        |        |         |       |
| <b>XXL VLDL</b> (XXL.VLDL.TGpct)                         | 61.7  | 31.6  | %      | 816 | -0.057 | -0.161 | 0.047  | 0.286   | 0     |
| <b>XL VLDL</b> (XL.VLDL.TGpct)                           | 52.1  | 29.5  | %      | 806 | -0.095 | -0.199 | 0.009  | 0.074   | 0     |
| <b>L VLDL</b> (L.VLDL.TGpct)                             | 53.5  | 21.6  | %      | 870 | -0.048 | -0.148 | 0.052  | 0.344   | 0     |
| <b>M VLDL</b> (M.VLDL.TGpct)                             | 55.1  | 3.944 | %      | 929 | 0.002  | -0.095 | 0.098  | 0.973   | 0     |
| <b>S VLDL</b> (S.VLDL.TGpct)                             | 42.7  | 4.337 | %      | 930 | -0.052 | -0.149 | 0.044  | 0.286   | 0     |
| <b>XS VLDL</b> (XS.VLDL.TGpct)                           | 21.6  | 3.992 | %      | 931 | -0.068 | -0.164 | 0.028  | 0.167   | 0     |
| <b>IDL</b> (IDL.TGpct)                                   | 9.8   | 2.095 | %      | 931 | -0.027 | -0.123 | 0.069  | 0.583   | 0     |
| <b>L LDL</b> (L.LDL.TGpct)                               | 6.9   | 1.620 | %      | 931 | -0.006 | -0.102 | 0.090  | 0.901   | 0     |
| <b>M LDL</b> (M.LDL.TGpct)                               | 5.6   | 1.546 | %      | 931 | 0.019  | -0.077 | 0.115  | 0.699   | 0     |
| <b>S LDL</b> (S.LDL.TGpct)                               | 5.6   | 1.571 | %      | 930 | -0.079 | -0.175 | 0.017  | 0.109   | 0     |
| <b>XL HDL</b> (XL.HDL.TGpct)                             | 2.9   | 1.998 | %      | 925 | -0.112 | -0.208 | -0.016 | 0.023   | 0     |
| <b>L HDL</b> (L.HDL.TGpct)                               | 3.4   | 1.477 | %      | 927 | -0.077 | -0.174 | 0.019  | 0.116   | 0     |

|                            |     |       |   |     |        |        |        |       |   |
|----------------------------|-----|-------|---|-----|--------|--------|--------|-------|---|
| <b>M HDL (M.HDL.TGpct)</b> | 4.6 | 1.397 | % | 931 | -0.103 | -0.199 | -0.007 | 0.036 | 0 |
| <b>S HDL (S.HDL.TGpct)</b> | 4.1 | 0.967 | % | 931 | -0.117 | -0.213 | -0.021 | 0.018 | 0 |

---

***Phospholipids to total lipids ratio in***

|                                  |      |       |   |     |        |        |        |         |       |
|----------------------------------|------|-------|---|-----|--------|--------|--------|---------|-------|
| <b>XXL VLDL (XXL.VLDL.PLpct)</b> | 7.3  | 4.239 | % | 816 | -0.137 | -0.240 | -0.033 | 0.0099  | 0     |
| <b>XL VLDL (XL.VLDL.PLpct)</b>   | 9.8  | 6.137 | % | 806 | -0.105 | -0.209 | -0.001 | 0.049   | 0     |
| <b>L VLDL (L.VLDL.PLpct)</b>     | 14.4 | 5.862 | % | 870 | -0.181 | -0.280 | -0.082 | 0.00037 | 0.591 |
| <b>M VLDL (M.VLDL.PLpct)</b>     | 20.2 | 0.701 | % | 929 | 0.100  | 0.004  | 0.196  | 0.042   | 0     |
| <b>S VLDL (S.VLDL.PLpct)</b>     | 24.2 | 1.381 | % | 930 | 0.137  | 0.041  | 0.233  | 0.0052  | 0.020 |
| <b>XS VLDL (XS.VLDL.PLpct)</b>   | 29.1 | 1.823 | % | 931 | 0.067  | -0.029 | 0.163  | 0.172   | 0     |
| <b>IDL (IDL.PLpct)</b>           | 28.0 | 0.849 | % | 931 | 0.149  | 0.053  | 0.245  | 0.0024  | 0.234 |
| <b>L LDL (L.LDL.PLpct)</b>       | 27.5 | 2.063 | % | 931 | 0.074  | -0.023 | 0.170  | 0.134   | 0     |
| <b>M LDL (M.LDL.PLpct)</b>       | 30.1 | 3.671 | % | 931 | 0.042  | -0.055 | 0.138  | 0.396   | 0     |
| <b>S LDL (S.LDL.PLpct)</b>       | 34.3 | 4.183 | % | 930 | 0.053  | -0.043 | 0.149  | 0.281   | 0     |
| <b>XL HDL (XL.HDL.PLpct)</b>     | 49.1 | 8.033 | % | 925 | 0.078  | -0.019 | 0.174  | 0.115   | 0     |
| <b>L HDL (L.HDL.PLpct)</b>       | 48.3 | 5.677 | % | 927 | -0.106 | -0.202 | -0.009 | 0.032   | 0     |
| <b>M HDL (M.HDL.PLpct)</b>       | 45.7 | 1.837 | % | 931 | -0.037 | -0.133 | 0.060  | 0.454   | 0     |
| <b>S HDL (S.HDL.PLpct)</b>       | 55.7 | 2.612 | % | 931 | 0.003  | -0.093 | 0.099  | 0.952   | 0     |

---

***Cholesterol esters to total lipids ratio in***

|                                  |      |       |   |     |        |        |        |       |   |
|----------------------------------|------|-------|---|-----|--------|--------|--------|-------|---|
| <b>XXL VLDL (XXL.VLDL.CEpct)</b> | 6.7  | 4.478 | % | 816 | -0.095 | -0.199 | 0.008  | 0.072 | 0 |
| <b>XL VLDL (XL.VLDL.CEpct)</b>   | 9.4  | 6.081 | % | 806 | -0.034 | -0.138 | 0.070  | 0.519 | 0 |
| <b>L VLDL (L.VLDL.CEpct)</b>     | 12.2 | 5.490 | % | 870 | -0.012 | -0.112 | 0.088  | 0.820 | 0 |
| <b>M VLDL (M.VLDL.CEpct)</b>     | 15.0 | 3.309 | % | 929 | 0.061  | -0.035 | 0.157  | 0.215 | 0 |
| <b>S VLDL (S.VLDL.CEpct)</b>     | 20.2 | 4.237 | % | 930 | 0.018  | -0.078 | 0.115  | 0.710 | 0 |
| <b>XS VLDL (XS.VLDL.CEpct)</b>   | 33.5 | 2.638 | % | 931 | 0.037  | -0.060 | 0.133  | 0.457 | 0 |
| <b>IDL (IDL.CEpct)</b>           | 44.4 | 2.052 | % | 931 | -0.104 | -0.200 | -0.008 | 0.035 | 0 |
| <b>L LDL (L.LDL.CEpct)</b>       | 45.4 | 3.673 | % | 931 | -0.092 | -0.188 | 0.004  | 0.061 | 0 |
| <b>M LDL (M.LDL.CEpct)</b>       | 42.5 | 6.666 | % | 931 | -0.061 | -0.158 | 0.035  | 0.213 | 0 |
| <b>S LDL (S.LDL.CEpct)</b>       | 40.1 | 6.563 | % | 930 | -0.044 | -0.140 | 0.053  | 0.375 | 0 |
| <b>XL HDL (XL.HDL.CEpct)</b>     | 34.6 | 6.330 | % | 925 | -0.060 | -0.157 | 0.036  | 0.220 | 0 |
| <b>L HDL (L.HDL.CEpct)</b>       | 37.6 | 4.408 | % | 927 | 0.108  | 0.011  | 0.204  | 0.029 | 0 |
| <b>M HDL (M.HDL.CEpct)</b>       | 41.0 | 2.262 | % | 931 | 0.108  | 0.012  | 0.205  | 0.027 | 0 |
| <b>S HDL (S.HDL.CEpct)</b>       | 30.1 | 3.188 | % | 931 | 0.019  | -0.077 | 0.116  | 0.692 | 0 |

---

***Free cholesterol to total lipids ratio in***

|                                  |      |       |   |     |        |         |        |         |       |
|----------------------------------|------|-------|---|-----|--------|---------|--------|---------|-------|
| <b>XXL VLDL (XXL.VLDL.FCpct)</b> | 4.1  | 2.763 | % | 816 | -0.130 | -0.234  | -0.026 | 0.014   | 0     |
| <b>XL VLDL (XL.VLDL.FCpct)</b>   | 5.0  | 3.409 | % | 806 | -0.063 | -0.167  | 0.041  | 0.234   | 0     |
| <b>L VLDL (L.VLDL.FCpct)</b>     | 6.2  | 3.503 | % | 870 | -0.166 | -0.266  | -0.067 | 0.0011  | 0.397 |
| <b>M VLDL (M.VLDL.FCpct)</b>     | 9.7  | 1.584 | % | 929 | -0.176 | -0.271  | -0.080 | 0.00034 | 0.593 |
| <b>S VLDL (S.VLDL.FCpct)</b>     | 12.9 | 0.739 | % | 930 | -0.041 | -0.138  | 0.055  | 0.403   | 0     |
| <b>XS VLDL (XS.VLDL.FCpct)</b>   | 15.7 | 1.061 | % | 931 | 0.059  | -0.037  | 0.155  | 0.229   | 0     |
| <b>IDL (IDL.FCpct)</b>           | 17.8 | 1.245 | % | 931 | 0.104  | 0.007   | 0.200  | 0.035   | 0     |
| <b>L LDL (L.LDL.FCpct)</b>       | 20.2 | 1.305 | % | 931 | 0.144  | 0.048   | 0.240  | 0.0034  | 0.127 |
| <b>M LDL (M.LDL.FCpct)</b>       | 21.7 | 2.497 | % | 931 | 0.097  | 0.001   | 0.194  | 0.048   | 0     |
| <b>S LDL (S.LDL.FCpct)</b>       | 20.0 | 1.960 | % | 930 | 0.096  | -0.0005 | 0.192  | 0.051   | 0     |

|                              |      |       |   |     |        |        |       |       |   |
|------------------------------|------|-------|---|-----|--------|--------|-------|-------|---|
| <b>XL HDL</b> (XL.HDL.FCpct) | 12.2 | 1.843 | % | 925 | -0.019 | -0.115 | 0.078 | 0.703 | 0 |
| <b>L HDL</b> (L.HDL.FCpct)   | 9.7  | 1.838 | % | 927 | 0.113  | 0.016  | 0.209 | 0.022 | 0 |
| <b>M HDL</b> (M.HDL.FCpct)   | 8.6  | 0.683 | % | 931 | 0.016  | -0.081 | 0.112 | 0.753 | 0 |
| <b>S HDL</b> (S.HDL.FCpct)   | 10.1 | 0.475 | % | 931 | 0.024  | -0.073 | 0.120 | 0.632 | 0 |

---

cu. standardized concentration unit

Table S4. Nominally significant metabolomic associations of the interaction between *DHCR24* rs588709 genotype, visceral fat and circulating concentration of PC16:0/2:0, and the associations of the corresponding metabolic measures with white matter microstructure.

| trait            | Test statistics of the interaction term from a<br>model trait~rs588709*VF*PC16:0/2:0 |       |        | Test statistics from a model<br>WMT1WSI~trait |       |          | N   |
|------------------|--------------------------------------------------------------------------------------|-------|--------|-----------------------------------------------|-------|----------|-----|
|                  | Beta                                                                                 | SE    | P      | Beta                                          | SE    | P        |     |
| bOHBut           | -0.129                                                                               | 0.048 | 0.0079 | -0.012                                        | 0.035 | 0.74     | 846 |
| DHA to FA ratio  | 0.124                                                                                | 0.049 | 0.013  | 0.167                                         | 0.034 | 6.81E-07 | 843 |
| DHA              | 0.105                                                                                | 0.049 | 0.031  | 0.232                                         | 0.033 | 7.79E-12 | 843 |
| FAw3 to FA ratio | 0.097                                                                                | 0.049 | 0.048  | 0.176                                         | 0.034 | 2.94E-07 | 843 |
| Lac              | -0.096                                                                               | 0.049 | 0.048  | 0.008                                         | 0.035 | 0.80     | 846 |

## References

1. Delaneau O, Zagury JF, Marchini J. Improved whole-chromosome phasing for disease and population genetic studies. *Nat Methods*. 2013;10(1):5–6.
2. Howie BN, Donnelly P, Marchini J. A flexible and accurate genotype imputation method for the next generation of genome-wide association studies. *PLoS Genet*. 2009;5(6).
3. Schwartz DH, Dickie E, Pangelinan MM, Leonard G, Perron M, Pike GB, et al. Adiposity is associated with structural properties of the adolescent brain. *Neuroimage*. 2014;103:192–201.
4. Goodwin K, Syme C, Abrahamowicz M, Leonard GT, Richer L, Perron M, et al. Routine clinical measures of adiposity as predictors of visceral fat in adolescence: A population-based magnetic resonance imaging study. *PLoS One*. 2013;8(11):e79896.
5. Pausova Z, Paus T, Abrahamowicz M, Bernard M, Gaudet D, Leonard G, et al. Cohort Profile: The Saguenay Youth Study (SYS). *Int J Epidemiol*. 2017;46(2):e19.
6. Syme C, Czajkowski S, Shin J, Abrahamowicz M, Leonard G, Perron M, et al. Glycerophosphocholine Metabolites and Cardiovascular Disease Risk Factors in Adolescents: A Cohort Study. *Circulation*. 2016;
7. Xu H, Valenzuela N, Fai S, Figeys D, Bennett SAL. Targeted lipidomics - Advances in profiling lysophosphocholine and platelet-activating factor second messengers. *FEBS J*. 2013;280(22):5652–67.
8. Ojala PJ, Hirvonen TE, Hermansson M, Somerharju P, Parkkinen J. Acyl Chain-Dependent Effect of Lysophosphatidylcholine on Human Neutrophils. *J Leukoc Biol*. 2007;82:1501–9.
9. Yan JJ, Jung JS, Lee JE, Lee J, Huh SO, Kim HS, et al. Therapeutic effects of lysophosphatidylcholine in experimental sepsis. *Nat Med*. 2004;10(2):161–7.
10. Marathe GK, Pandit C, Lakshmikanth CL, Chaithra VH, Jacob SP, D’Souza CJM. To hydrolyze or not to hydrolyze: the dilemma of platelet-activating factor acetylhydrolase. *J Lipid Res*. 2014;55(9):1847–54.
11. Soininen P, Kangas AJ, Würtz P, Suna T, Ala-Korpela M. Quantitative serum nuclear magnetic resonance metabolomics in cardiovascular epidemiology and genetics. *Circ Cardiovasc Genet*. 2015;8(1):192–206.
12. Soininen P, Kangas AJ, Würtz P, Tukiainen T, Tynkkynen T, Laatikainen R, et al. High-throughput serum NMR metabolomics for cost-effective holistic studies on systemic metabolism. *Analyst*. 2009;134(9):1781–5.
13. Würtz P, Kangas AJ, Soininen P, Lawlor DA, Davey Smith G, Ala-Korpela M. Quantitative Serum Nuclear Magnetic Resonance Metabolomics in Large-Scale Epidemiology: A Primer on -Omic Technologies. *Am J Epidemiol*. 2017;186(9):1084–96.
14. Wang D, Liu S, Warrell J, Won H, Shi X, Navarro FCP, et al. Comprehensive functional genomic resource and integrative model for the human brain. *Science (80- )*. 2018;362(6420).
15. Lake BB, Ai R, Kaeser GE, Salathia NS, Yung YC, Liu R, et al. Neuronal subtypes and diversity revealed by single-nucleus RNA sequencing of the human brain. *Science (80- )*. 2016;352(6293):1586–90.
16. Chen J, Bardes EE, Aronow BJ, Jegga AG. ToppGene Suite for gene list enrichment analysis and candidate gene prioritization. *Nucleic Acids Res*. 2009;37(SUPPL. 2):305–11.
17. Lonsdale J, Thomas J, Salvatore M, Phillips R, Lo E, Shad S, et al. The Genotype-Tissue Expression (GTEx) project. *Nat Genet*. 2013;45(6):580–5.
18. Kettunen J, Demirkan A, Würtz P, Draisma HHM, Haller T, Rawal R, et al. Genome-wide study for circulating metabolites identifies 62 loci and reveals novel systemic effects of LPA. *Nat Commun*. 2016;7:11122.
